1 **Title**

2 Dynamic Hh signaling can generate temporal information during tissue patterning.

3 **Authors:**

4 Diana García-Morales<sup>1</sup>, Tomás Navarro<sup>1</sup>, Antonella Iannini<sup>1</sup>, David G. Míguez<sup>2\*</sup> and  
5 Fernando Casares<sup>1\*</sup>

6 **Affiliations:**

7 1- CABD (CSIC-Universidad Pablo de Olavide-Junta de Andalucía), GEM-DMC2 Unit.  
8 Campus UPO, 41013 Seville, SPAIN.

9 2- Centro de Biología Molecular Severo Ochoa (CSIC-UAM). Campus de  
10 Cantoblanco, 28049 Madrid, SPAIN.

11 (\*) Correspondence: fcasfer@upo.es; david.miguez@uam.es

12 **ABSTRACT:**

13 The differentiation of tissues and organs requires that cells exchange information in space  
14 and time. Spatial information is often conveyed by morphogens, molecules that disperse  
15 across receiving cells generating signaling gradients. Cells translate such concentration  
16 gradients into space-dependent patterns of gene expression and cellular behavior [1, 2].  
17 But could morphogen gradients also convey developmental time? Here, investigating the  
18 developmental role of Hh on a component of the *Drosophila* visual system, the ocellar  
19 retina, we discovered that ocellar cells use the non-linear gradient of Hh as a temporal  
20 cue, collectively performing the biological equivalent of a mathematical logarithmic  
21 transformation. In this way, a morphogen diffusing from a non-moving source is decoded  
22 as a wave of differentiating photoreceptors that travels at constant speed throughout the  
23 retinal epithelium.

24

25

26

## 27 **RESULTS AND DISCUSSION.**

28 Morphogens of the *hedgehog(hh)/Shh* family contribute spatial information during the  
29 development of a wide range of organs and organisms [3]. In addition, during the  
30 development of the *Drosophila* compound eye, Hh drives a wave of photoreceptor (R) cell  
31 differentiation across the eye primordium at a constant speed [4, 5]. A similar Shh moving  
32 wave has been described during the differentiation of the ganglion cells in the zebrafish  
33 retina [6]. However, these waves are not generated based on the morphogen character of  
34 Hh/Shh (i.e. differential responses to varying Hh concentration in space), but on the fact  
35 that the source of Hh production itself moves across the developing retina: Hh/Shh  
36 molecules non-autonomously induce progenitors to differentiate into retina cells which, in  
37 turn, start producing Hh/Shh. In this way, the source of signaling molecule moves coupled  
38 to the differentiation process [5, 6].

39

40 In addition to the compound eye, Hh signaling is necessary for the specification and  
41 differentiation of the *Drosophila* ocelli [7-9], three small eyes (one anterior and two  
42 posterior) located on the fly's forehead that are part of the visual system of most insects  
43 (Figure 1A,B). Ocellar differentiation takes place in the dorsal-anterior region of the eye-  
44 antennal imaginal disc (Figure 1B). Here, one domain of Hh expression is flanked by two  
45 regions competent to differentiate into the ocellar photoreceptors (R cells) under the action  
46 of Hh signaling. One marker of competence is the gene *eyes absent (eya)* ([8, 9]) (Figure  
47 1C,D). When the two contralateral discs fuse, the anterior ocellar regions merge into a  
48 single anterior ocellus (aOC), while the two other regions remain separate and will develop  
49 into the paired posterior ocelli (POC). Here we focused on the larger posterior ocellus to  
50 study how ocellar progenitor cells differentiate. R differentiation can be followed using the  
51 neuronal markers *Elav* and *Glass*. We observed that R cell differentiation proceeded in a  
52 wave-like fashion –i.e., differentiation starts in the vicinity of the Hh source, to then

53 progress in the proximal-distal direction across the ocellar tissue (Figure 1E). The transition  
54 from precursors to R cells can be monitored using the precursor marker gene *senseless*  
55 (*sens*) (Figure 1-Figure S1A-C). We find that, like in the compound eye, *Sens*  
56 expression precedes temporally that of *Elav*. *Sens* expression in differentiating R cells is  
57 transient, and it decreases as *Elav* expression increases. Spatially, *Sens* and *Elav*  
58 distribute along a proximal-distal axis with respect to the Hh source. Therefore, the  
59 differentiation wave can be visualized as a succession of *Elav* and *Sens* along this axis,  
60 with new *Sens* expressing cells being added progressively further away from the Hh  
61 source as differentiating cells express *Elav* and downregulate *Sens* (Figure 1-Figure S1).  
62 Importantly, and in contrast to the moving wave of Hh that sweeps across the developing  
63 compound eye, Hh is never expressed in ocellar R cells (Figure 1-Figure S1D,D')[9, 11].  
64 The Hh source remains the inter-ocellar region and therefore, does not move in space. To  
65 start investigating the potential role of Hh signaling in organizing this wave, we first  
66 examined the distribution of Hh across the competence domain, which is about 40 $\mu$ m (10  
67 cells) wide, using a Hh:GFP BAC construct [12]. Hh:GFP disperses away from its source  
68 following roughly a decaying exponential, that can be fitted in space and time using a  
69 polynomial function (Figure 2A,A' and see below). The Hh receptor Patched (*Ptc*) is also a  
70 target of the signaling pathway, so that its expression can be used as a read-out of the  
71 pathway's signaling activity [13]. We found that, before R differentiation starts, *Ptc*  
72 expression follows the Hh:GFP gradient (Figure 2A,A' and see below), indicating that  
73 signaling intensity reflects Hh distribution across the ocellus. In addition, this result  
74 suggested that the non-uniform Hh distribution could contribute to generating the wave,  
75 transforming the spatial gradient into a temporal axis, such that cells closer to the Hh  
76 source (and therefore, receiving higher concentration of Hh) would differentiate earlier than  
77 cells farther away. To test this possibility, we equalized Hh signaling across the developing  
78 ocellus by expressing, specifically in the ocellar primordia, uniform levels of *cubitus*

79 *interruptus (ci)*, the Gli-type nuclear transducer of the Hh pathway [14], (Figure 2B,C and  
80 Figure 2-Figure S1A,B). After Ci overexpression, a larger than normal number of cells had  
81 initiated the expression of Sens and Elav relative to control ocelli, indicating their  
82 premature differentiation. More importantly, the progression of the wave was disrupted:  
83 instead of the succession of Elav and Sens cells, in Ci-overexpressing ocelli Elav and  
84 Sens cells are intermingled (Figure 2B,C). This result was compatible with the idea that  
85 the Hh signaling gradient encodes a temporal axis that generates the wave-like  
86 differentiation of ocellar R cells. To test this point more directly, we distorted the normal  
87 distribution of Hh by inducing new foci of Hh expression from around the developing ocelli  
88 (*wg2.11-GAL4; UAS-GFP:Hh* or "*wg>Hh*"; [15] and Figure 3) to then compare the spatial  
89 patterns of Elav+Sens-, Elav+Sens+ and Elav-Sens+ cells between control and *wg>Hh*  
90 ocelli (Figure 3A-D'). Since even the wild type pattern shows some variability, we used a  
91 statistical analysis to compare the "grouping" (as measured by the departure from a  
92 random proportion of neighbors of a given type) and "polarity", which measures the  
93 ordered succession of cells states along the proximodistal axis (and that is a defining trait  
94 of a wave) (Figure 3E-G'), of these patterns. Control and *wg>Hh* patterns were both  
95 significantly -but similarly- different from random (Figure 3 S1A), as expected if spatially  
96 localized Hh drives the pattern of differentiation. However, when "polarity", the statistic  
97 that reflects a wave-like organization, was analyzed, control samples were significantly  
98 more polarized than *wg>Hh*, which were closer to a non-polarized distribution (Figure 3  
99 S1B; see Methods for a complete description of the statistical analysis). These results  
100 confirm that, despite the variability of the system, the pattern of differentiation from Sens  
101 precursors to Elav photoreceptors progresses as a wave, and reinforces the notion that  
102 the distribution of Hh across the developing ocellus is necessary for organizing this wave.  
103 Next, we tested whether blocking Hh signaling could result in abrogation of R  
104 differentiation. To do that, we expressed a dominant negative Ptc receptor (*PtcΔloop2*

105 which, due to its incapacity to bind Hh, represses the pathway constitutively [2]). Our  
106 results show that, as in the compound eye, Hh is necessary for R differentiation in the  
107 ocelli (Figure 2-Figure S1C-E). Altogether, our results so far indicated that the time  
108 needed for a cell to start differentiating depends on the amount of Hh that it receives.  
109 Because Hh distribution decays non-linearly in space (Figure 2A'), R cells should also  
110 accumulate non-linearly over time (i.e. with fast R generation close to the source and  
111 progressively slowing down with increasing distance from it). To test this hypothesis, we  
112 quantified the number of Elav-expressing R cells over developmental time. As  
113 developmental timer we used the number of rows of ommatidia that have undergone  
114 differentiation in the compound eye, which is known to increase at a constant speed [16,  
115 17]. In contrast with the expectation, the number of Elav cells increased linearly with time  
116 in both anterior and posterior ocelli, indicating that the differentiation wave propagated at a  
117 constant speed (Figure 2D).

118 In order to explore the signaling outputs in this system, we constructed a mathematical  
119 model capturing the essence of the Hh signaling pathway (see Methods). In this model,  
120 Ptc represses Hh signaling targets unless it binds Hh. As Ptc is one of the pathway's  
121 targets, Hh binding to Ptc results in the releases Ptc's repressive action and results in its  
122 upregulation [13]. Sens is included as a target in the model, although this does not imply  
123 that Sens is a *direct* target. Expression of Elav in Sens-expressing precursors follows  
124 irreversibly, and to reflect the loss of Sens expression observed in Elav cells, we have also  
125 included a negative feedback from Elav to Sens (see Figure 4A). The dynamics of Hh  
126 production and dispersion in the model were calibrated using measured Hh:GFP profiles  
127 determined experimentally (Figure 4-FigureS1; and Figure 4-STable). The intrinsic  
128 variability of the system is modeled by introducing a 20% variability in all parameters of the  
129 model (see Methods). With no further assumptions, the model simulations confirmed the  
130 prior expectation: the accumulation of Elav cells was non-linear and differentiation was

131 often not completed during the developmental period allowed (40 hours)(Figure 4B). The  
132 fact that the model was unable to reproduce the experimental observations indicated that  
133 our understanding of the signaling dynamics was missing some important process. Due to  
134 the key relevance of Ptc as both Hh receptor and target of the pathway, we examined in  
135 detail the dynamics of Ptc accumulation during differentiation. We found that, while before  
136 R cell differentiation Ptc signal followed a non-linear decay with a strong peak close to the  
137 Hh source (see Figure 1A,A'), in later stages Ptc signal decreased dramatically in R cells,  
138 identified by expression of Elav (Figure 4C-D'). Since binding of Hh to Ptc reduces its  
139 mobility [18], we reasoned that the reduction of Ptc availability in R cells could allow the  
140 non-bound Hh to move over these cells and disperse farther away from the source. In this  
141 model, the sequential dampening of Ptc expression acts as a “desensitization”  
142 mechanism. When this Ptc dampening was incorporated in the model (simplified as a  
143 repressor link from Elav-R to Ptc) it now correctly predicted that the differentiation wave  
144 moves with about constant velocity, and achieves the full differentiation of the progenitor  
145 population during the differentiation window (Figure 4E) (See also Figure 4-Supplementary  
146 Videos 1 and 2). In addition, the simulated dynamic profile of Hh matched that measured  
147 experimentally (Figure 4-Figure S1), with its gradient flattening and reaching further as  
148 developmental time progresses. Simulations include the approximate 50% reduction of  
149 Hh:GFP production that we observed experimentally (Figure 4-Figure S1A) but the results  
150 remain the same if the Hh production rate is maintained constant (Figure 4-Figure S2).  
151 Therefore, the desensitization of differentiating cells to Hh, caused by the dampening of  
152 Ptc, would allow the field of ocellar competent cells to transform the Hh gradient into a  
153 moving signaling and differentiation wave of constant speed. It has been described that  
154 Ptc is down-regulated upon binding to Hh [19-21] and also in a self-regulated manner [22]  
155 in *Drosophila* wing discs. To test if the dramatic downregulation of Ptc we observe was  
156 due to R cell differentiation or just to a process depending on ligand binding or Ptc

157 concentration, we examined Ptc levels in the ocelli of late discs from *atonal* (*ato*) mutant  
158 larvae, in which R differentiation is abrogated (Figure 4-Figure S3). For each disc, the  
159 levels of Ptc signal in the ocelli were normalized relative to the signal in the antenna of the  
160 same disc. While in control discs (*ato1-/+*) the relative levels of Ptc decrease with time  
161 (Figure 4-Figure S3A,B), Ptc expression is maintained at levels comparable to those found  
162 in control discs before R differentiation onset, despite their having been exposed to Hh for  
163 the whole duration of the third larval stage (Figure 4-Figure S3C). To test directly whether  
164 R differentiation was causing Ptc downregulation, we drove uniform and premature Sens  
165 expression to force ocellar cells to differentiate prematurely. As expected after Sens  
166 overexpression, the ocellar region of *eyaL>Sens* larvae had an increased number of Elav-  
167 expressing cells (relative to stage-matched controls). These cells also showed a  
168 concomitant loss of Ptc expression (Figure 4-Figure S3F,G). Therefore, in the ocelli, R  
169 differentiation is a major controller of Ptc dynamics.

170 One important aspect of ocellar differentiation is that, by the end of development, the  
171 number of R cells per ocellus is very consistent (the number of R cells of the adult  
172 posterior ocellus is 47,9; s.d.=0,7; n=5). However, we have noticed in static measurements  
173 of Hh:GFP that its signal is highly variable. To test for robustness, we compared the output  
174 of the model with or without signal desensitization, varying Hh production rates up to 10%.  
175 While without desensitization dynamics were far from linear, and the time to differentiation  
176 termination varied widely, the model including reduced Ptc availability coupled with  
177 differentiation maintained linearity (i.e. constant differentiation speed), and showed low  
178 variability in time to termination, despite these variations in production rates (Figure 5 and  
179 Figure -FigureS1). Therefore, our model predicts that, in addition to promoting a  
180 differentiation wave of constant speed, the R differentiation-induced Ptc desensitization  
181 results in increased developmental reliability.

182

183 Previous work has shown, in different developmental contexts, how a spatially static  
184 source of Hh/Shh coupled to its dynamic intracellular signaling network can generate  
185 spatial patterns of gene expression [23, 24]. In this paper, we show that a similarly static  
186 Hh source can be decoded as a linear “time arrow” – a wave of differentiation of  
187 photoreceptors with constant speed. This capacity requires a single change in the  
188 regulation of the Hh receptor Ptc. Two system-level properties are worth mentioning: First,  
189 the “log-transform” of the gradient’s signal is an active process, in the sense that cells are  
190 not passive readers, but transform the signal dynamically through a reactive intracellular  
191 signaling network. Second, the mathematical transformation of the signal is an emerging  
192 property of the system: While the signaling changes operate at a single cell level, this  
193 transformation requires a number of cells coupled within a Hh gradient. Even though the  
194 pervasive use of Hh/Shh as a morphogen might be the result of evolutionary  
195 contingencies, an alternative explanation is that Hh and its signaling pathway, acting on  
196 fields of cells, is flexible in the type of information outputs cells generate when reading the  
197 gradient. It is conceivable that this flexibility would be a selective advantage that might  
198 have resulted in the Hh signaling pathway being redeployed once and again during  
199 evolution.



## 200 FIGURES AND LEGENDS

201 **Figure 1. Photoreceptor (R) differentiation in the *Drosophila* ocelli.** (A) SEM view of a  
202 *Drosophila* head. Outlined, the ocelli (“oc”), the compound eye (“ce”) –both pseudocolored)  
203 and the antenna (“a”). (B) Confocal image of an eye-antennal head primordium of a  
204 Hh:GFP-BAC larva (late third instar) marking the prospective “oc”, “ce” and “a”. Hh:GFP in  
205 green. (C) Close up of the prospective ocellar region of a Hh:GFP-BAC primordium  
206 (green) stained for Eya (competence marker, blue) and Elav (neural marker, magenta). Hh  
207 is produced from a central domain that will become the interocellar region (iOR). The  
208 position of the Hh-expressing domain is marked by the asterisk (\*) in C-E””. Adjacent to it,  
209 the anterior and posterior domains of Eya-expressing cells will become the anterior (aOC)  
210 and posterior (pOC) ocelli, respectively. (D) Schematic representation of the ocellar region,  
211 showing the Hh-producing and Eya-expressing domains. The arrows indicate the spatial  
212 axes. (E-E””) Temporal series of pOC regions from progressively older larvae/early pupa  
213 (as indicated by the “time” arrow), marked with Eya (blue) and Elav  
214 (Elav>nRFP\_ires\_mGFP). Images are from different, fixed discs. Elav-expressing  
215 photoreceptor (“R”) cells appear first closest to the Hh source (E) and then accumulate  
216 successively in more distal regions (E’-E””). Nuclei and membranes of Elav cells are  
217 marked in magenta and green, respectively.

218

219 **Figure 1-Figure S1. R cells do not express Hh and differentiate following a**  
220 ***senseless-Elav* sequence.** (A,B) Sens and Elav mark the progress from precursors  
221 (Sens, red) to differentiating photoreceptors (Elav, blue). Confocal image of a posterior  
222 ocellar region of third instar stage 17 ommatidia (A) and 23 ommatidia (B) discs of an  
223 *eya>GFP* larvae. Eya (green) expression marks the ocellar competent region (outlined in  
224 A’-A” and B’-B”). At St17 Sens is expressed adjacent or close to the proximal border of the  
225 ocellus and no Elva R cells have yet differentiated. At St23, Elav R cells have

226 differentiated and new Sens-positive cells are induced distal to them. The white arrows in  
227 A' and B' indicate the position of the Sens front relative to the Hh source. Axes as in Figure  
228 1. (C) Schematic representation of the temporal changes in gene expression experienced  
229 by any cell in the ocellar complex. Competent cells (expressing Eya), upon receiving Hh  
230 signal, progress along their differentiation program, expressing Sens first, then Elav. The  
231 connecting links are dashed to indicate that the activations (arrow) or repression (flat end)  
232 are likely indirect. (D,D') Confocal image of an ocellar region (bracketed) from a *hh-*  
233 *Gal4>UAS-GFP:Hh* disc, stained for GFP, Ptc and Elav (D). (D') shows the GFP and Elav  
234 channels only. Elav-expressing R cells, which differentiate in a region of Hh signaling (i.e.  
235 Ptc-expressing), do not transcribe Hh.

236

237 **Figure 2. Hh signaling and R differentiation wave.** (A) Confocal image of the ocellar  
238 region of a Hh:GFP; GMR>tdTomato ("GMR>tom") larva (stage 17 ommatidia), stained for  
239 Hh:GFP (blue), Ptc (green) and anti-Tomato (red). No R cells ("GMR>tom") have as yet  
240 differentiated. (A') Quantitative profiles of the Hh:GFP, Ptc and GMR signals across the Hh  
241 producing domain (shaded in grey) and the pOC (measured in the dashed yellow box in  
242 (A)). Hh:GFP signal decays non-linearly. Ptc signal follows that of Hh:GFP at this stage,  
243 when no R cell (GMR>Tom) has differentiated yet. (B,C) pOC regions (boxed, like the  
244 corresponding region in (A)) stained for Elav (red) and Sens (blue) of discs from larvae of  
245 the same stage (21 ommatidia). In the control (B, "eyaL>+") a row of R-expressing Elav  
246 cells precede a row of Sens-expressing precursors. In *eyaL>Ci* (C, causing the uniform  
247 and strong expression of Ci) precocious differentiation is observed. In addition, the  
248 differentiation wave, characterized by the succession Elav→Sens, is broken. (D) Number  
249 of Elav-positive cells in the pOC (red) and aOC (green) as a function of developmental  
250 time. The number of ommatidial rows in the compound eye, which increases linearly with  
251 time, was used as internal developmental timer. Data (circles) and means ("—") are

252 represented and fit well to a line. See Methods for a description of the statistical analysis.

253 Source data for Figure 2 A', D available as supplementary material (SD\_Figure2\_A'\_D).

254

255 **Figure 2-Figure S1. Driving a dominant-negative *Ptc* in the ocelli using the *eyaL-***

256 ***GAL4* blocks ocellar development.** (A,B) Enhancer activity of the FlyLight R20D09 *GAL4*

257 driver line ("*eyaL-GAL4*") before (A: stage 13; A':close-up) and after (B: stage 23; B':close-

258 up) R cell differentiation onset. Discs of *eyaL-GAL4; UAS-GFP* (*eyaL>GFP*) larvae were

259 stained for Eya, GFP and Elav (R cells). Ocellar region is enclosed in the dashed oval. In

260 (A), GFP signal is activated in the Eya-expressing ocellar domains. In later stages (B) GFP

261 signal overlaps Eya. Therefore, *EyaL-GAL4* drives expression in the ocellar *eya* domains

262 exclusively. (C,D) Ocellar regions of adult flies. Control (C: *eyaL-GAL4; UAS-GFP*,

263 "*eyaL>GFP*") and *eyaL-GAL4; UAS-ptcΔloop2* (D: "*eyaL>ptcΔloop2*"). *PtcΔloop2* acts as a

264 Hh-dominant negative protein (see Material and Methods and references). In

265 *eyaL>ptcΔloop2* flies the ocelli are severely reduced or absent (red arrows). (E) Dynamics

266 of R cells differentiation in the posterior ocellus (pOC) (as Elav-expressing cells) in

267 *eyaL>GFP* ("control") and *eyaL>ptcΔloop2* ("ptcDN"), with linear fits and  $R^2$  values. Source

268 data for Figure 2-Figure S1 is available as supplementary material (SD\_Figure2\_S1E).

269

270 **Figure 3. Altering Hh spatial distribution distorts the differentiation wave.** (A,B)

271 Cartoon depiction of the Hh sources (green domains) relative to the retina competent

272 regions (blue) in control (A) and *wg>Hh* (B) ocellar regions. The posterior ocellus is

273 marked as "pOC". The green triangles indicate the distribution of Hh from these sources.

274 In *wg>Hh*, Hh is expressed around the ocelli and within the normal Hh expression domain.

275 (C) Late *wg>Hh* disc (st:23) stained for GFP (GFP:Hh), Sens and Elav. The boxed region

276 corresponds to that represented in A and B. A' and B' are pOC regions from control and

277 *wg>Hh* individuals, respectively. (D,D') ocelli of control and *wg>Hh* adults. In *wg>Hh* ocelli  
278 are larger.

279

280 **Figure 3-Figure S1. Statistical analysis of Sens/Elav pattern in control and *wg>Hh***

281 **ocelli.** (A) Image of a Sens and Elav staining with superimposed grid and its translation

282 into a bidimensional matrix (A'), in which the three different states detected, Elav+Sens-,

283 Elav(+)Sens(+) and Elav-Sens+ are coded as 1, 2 and 3, respectively. (B-C') Examples

284 illustrating the two statistics used to analyze the pattern of Sens and Elav expression.

285 (B,B') Example of "random" (B) and "grouped" (B') "1" matrix. Neighbors are marked in

286 light colors. From left to right, the neighbor proportion is 0, 1/8 and 1/5, 0.1 on average for

287 (B), and 2/5, 2/8 and 2/5, 0.4 on average for (B'). (C,C') Example of "non-polarized" (C)

288 and "polarized" (C') "3" matrix. Polarity is calculated as the probability of finding a "3" in the

289 last column, estimated using column number as predictor, minus the expected probability

290 of success in the whole matrix (8/16). Polarity will be close to 0 for (C, "non-polarized") and

291 significantly larger than 0 for (C', "polarized"). See methods and Results for further details.

292 (D) Represents the departure from random grouping of different cell states ("order"). Both,

293 control and *wg>Hh* patterns show significant ordered grouping for all four comparisons

294 ( $p < 0.05$ ), although they do not differ significantly among them. (E) When the ordered

295 distribution of Elav or Sens along the proximodistal axis ("polarity") is computed, the

296 pattern in control ocelli is significantly polarized and much more so than in *wg>Hh*

297 samples. Only posterior ocelli were analyzed. Source data for this figure can be found as

298 supplementary material (SD\_Figure3\_S1).

299

300 **Figure 4. Loss of Ptc in R cells suffices to explain linear differentiation dynamics.** (A)

301 Cartoon diagram of the model for the Hh signaling pathway and its downstream effects. (B

302 and E) Spatio-temporal dynamics of the model's outputs without considering (B) or

303 considering (E) a negative feedback from Elav-expressing R cells to Ptc (“E” link in (A)). In  
304 (B) R cells (blue) accumulate hyperbolically and do not reach the end of the competent  
305 region within the time frame of 50h. In (E) (with negative feedback, all other parameters  
306 being the same) R accumulation dynamics is close to linear and R differentiation reaches  
307 the end of the competent region. Simulations have been carried out including a 50%  
308 reduction in Hh production rate along the 50 h time, as observed experimentally. Similar  
309 results are obtained if this rate is maintained constant (Figure 4-S2). (C,D) Ocellar region  
310 of a *st:18* (C,C’) and *st:23* (D,D’) *eyaL>GFP* disc, stained for GFP (marking the Eya-  
311 expressing competence domain), Ptc and Elav (R cells). Axes as in Figure 1. Elav-  
312 expressing cells (marked by arrows) show reduced levels of Ptc. Source code for Figure 4  
313 is available as supplementary material (SD\_Figure4\_script\_Hhpathwaymodel).

314

315 **Figure 4-Figure S1. Hh gradient dynamics.** (a) Plot of Hh:GFP signal (“concentration” in  
316 arbitrary units [a.u.]) as a function of time and space (in  $\mu\text{m}$ ), obtained from fixed samples  
317 at specific developmental time points (as no. of ommatidia in the compound eye)(See  
318 supplemental Source Data SD\_FigureS3). Model parameters were constrained using this  
319 data. (b,c) Plots of Hh dynamics from the simulations, not including (b) or including (c) the  
320 attenuation of Ptc expression in differentiating R cells. Note that in (c) (but not in (b)) the  
321 Hh gradient spreads farther with time, as observed in the measured profiles (a). Source  
322 data for Figure 4-Figure S1A (SD\_Figure4\_S1) and source code for 3D graph and  
323 polynomial adjustment (SD\_Figure4\_S1Dg\_polynadjust) are available as supplementary  
324 material.

325

326 **Figure 4- Supplementary Table. Table of values, units and sources of model**  
327 **parameters.**

328

329 **Figure 4- Figure S2. Differentiation dynamics and Ptc attenuation with a constant Hh**  
330 **production rate.** Cartoon diagrams of the model for the Hh signaling pathway without  
331 considering (A) or considering (B) a negative feedback from Elav-expressing R cells to Ptc  
332 and its downstream effects (left), and corresponding spatio-temporal dynamics (right). In  
333 (A) R cells (blue) accumulate hyperbolically and do not reach the end of the competent  
334 region within the time frame of 50h. In (B) (with negative feedback, all other parameters  
335 being the same) R accumulation dynamics is close to linear and R differentiation reaches  
336 the end of the competent region. Simulations performed maintaining a constant Hh  
337 production rate.

338

339 **Figure 4-Figure S3. Ptc signal and R cell differentiation.** (A-C) Ptc signal in the ocellar  
340 regions of mid L3 (mL3; A) and early pupa (eP; B) *ato1+/-* discs, and eP of an *ato1-/-* disc  
341 (C). (A'-C') quantification of Ptc signal in the ocellar regions ("oc", green) relative to that in  
342 the antenna of the same disc ("ant", grey), this latter used as an internal normalization. In  
343 *ato1+/-* controls, the ocellar Ptc signal is similar to that of the antenna (A'; n=6) in early  
344 discs but drops in later stages (early pupa: B', n=5). However, in late stage *ato1-/-* the Ptc  
345 signal ratio remains high (C'; n=6). Posterior and anterior ocelli (pOC and aOC) are  
346 marked in (B,C). In (A) the split of the Ptc domain in the two ocellar primordia has not yet  
347 occurred. (D,E) Adult ocellar complexes of *ato1+/-* and *ato1-/-* flies. In homozygous *ato1*  
348 individuals ocelli fail to develop. (F,G) Control (F: *eyaL>+*) and Sens-expressing (G:  
349 *eyaL>Sens*) pOC at st:23 stained for Elav and Ptc. In *eyaL>Sens* there is an increase in  
350 the number of Elav cells. Ptc signal is reduced in all Elav cells and, as a consequence, in  
351 *eyaL>Sens* Ptc levels are globally reduced also. Red arrows point to Elav cells.

352

353

354 **Figure 4-Supplementary Videos 1 and 2. Time lapse movies of the simulation**  
355 **without (Sup. Video 1) and with (Sup. Video 2) Ptc negative feedback regulation.**

356 Upper panel shown the concentration of Hh across the domain. Lower panel shows the  
357 cellular concentration of Ptc (green), Sens (red) and Elav (blue). Despite the variable  
358 response to Hh due to cell variability, a wave in photoreceptor differentiation (blue cells)  
359 can be observed as traveling away from the Hh source. The first movie (no Ptc  
360 downregulation) shows that the wave velocity diminishes and stops before reaching the  
361 end of the domain. The Hh gradient does not flatten. The second movie includes Ptc  
362 negative feedback, and shows how the differentiation wave moves at constant speed and  
363 reaches the end of the domain. The Hh gradient flattens.

364

365 **Fig 5. Robustness in the dynamics of the wave against changes in Hh increases**

366 **when Ptc feedback is present.** (A,B) Spacetime plots when Hh concentration is  
367 increased and decreased by 10% compared in the absence (A) or presence (B) of Ptc  
368 reduction in R cells (B). Colors represent the expression levels of Ptc (green), Sens (red)  
369 and Elav (blue). The solid line is used to represent the speed of the wave as a guide to the  
370 eye. The intensity of Hh in the left panel in (A) has been adjusted to facilitate comparison  
371 between (A) and (C). (C) Changes in the dynamics of the wave due to changes in Hh  
372 concentration. The model with no Ptc reduction (blue dashed line) is more sensitive to  
373 changes in Hh concentration than the situations with Ptc reduction. Statistics performed  
374 using 30 independent simulations for each point. Bars correspond to the standard  
375 deviation of each measurement. (D) Schematic depiction of the model proposed. Hh  
376 spreading leads to Ptc upregulation and maximal signal first closest to the source. As the  
377 cells differentiate, Ptc levels decrease allowing farther extension of Hh spreading. By each  
378 cell dynamically responding to Hh, the ocellar primordium transforms a noisy, non-linearly  
379 decaying signal into a differentiation wave of constant speed that is robust to signal noise.

380 Source code for Hh signaling model available as supplementary material  
381 (SD\_Figure4\_script\_Hhpathwaymodel).

382

383 **Figure 5-Figure S1. Dynamics of Hh signaling in response to its gradient.** (A,A')

384 Shape of the interactions taken into account in the model. (B,B') Snapshots of the

385 simulation at different times. Images above depict the Hh profile, while the bottom images

386 represent the cell differentiation state. Red: Sens cells; Blue: Elav R cells; Green: free Ptc

387 (See supp. videos 1 and 2). (C,C') Space-time plots of free Ptc (green), Sens (red) and

388 Elav (blue) and superposition of the three across the ocellus. The black lines (solid in (C)

389 and dashed in (C')) are used as a guide to the eye to show the speed of the differentiation

390 wave. Source code for Hh signaling model available as supplementary material

391 (SD\_Figure4\_script\_Hhpathwaymodel).

392



393 **REFERENCES**

- 394 1. Basler, K., and Struhl, G. (1994). Compartment boundaries and the control of  
395 *Drosophila* limb pattern by hedgehog protein. *Nature* 368, 208-214.
- 396 2. Briscoe, J., Chen, Y., Jessell, T.M., and Struhl, G. (2001). A hedgehog-insensitive  
397 form of patched provides evidence for direct long-range morphogen activity of sonic  
398 hedgehog in the neural tube. *Mol Cell* 7, 1279-1291.
- 399 3. Ingham, P.W., Nakano, Y., and Seger, C. (2011). Mechanisms and functions of  
400 Hedgehog signalling across the metazoa. *Nat Rev Genet* 12, 393-406.
- 401 4. Ma, C., Zhou, Y., Beachy, P.A., and Moses, K. (1993). The segment polarity gene  
402 hedgehog is required for progression of the morphogenetic furrow in the  
403 developing *Drosophila* eye. *Cell* 75, 927-938.
- 404 5. Heberlein, U., Wolff, T., and Rubin, G.M. (1993). The TGF beta homolog *dpp* and  
405 the segment polarity gene hedgehog are required for propagation of a  
406 morphogenetic wave in the *Drosophila* retina. *Cell* 75, 913-926.
- 407 6. Neumann, C.J., and Nüsslein-Volhard, C. (2000). Patterning of the zebrafish  
408 retina by a wave of sonic hedgehog activity. *Science* 289, 2137-2139.
- 409 7. Royet, J., and Finkelstein, R. (1996). hedgehog, wingless and orthodenticle specify  
410 adult head development in *Drosophila*. *Development* 122, 1849-1858.
- 411 8. Blanco, J., Seimiya, M., Pauli, T., Reichert, H., and Gehring, W.J. (2009). Wingless  
412 and Hedgehog signaling pathways regulate orthodenticle and eyes absent during  
413 ocelli development in *Drosophila*. *Dev Biol* 329, 104-115.
- 414 9. Aguilar-Hidalgo, D., Dominguez-Cejudo, M.A., Amore, G., Brockmann, A., Lemos,  
415 M.C., Cordoba, A., and Casares, F. (2013). A Hh-driven gene network controls  
416 specification, pattern and size of the *Drosophila* simple eyes. *Development* 140,  
417 82-92.
- 418 10. Nolo, R., Abbott, L.A., and Bellen, H.J. (2000). Senseless, a Zn finger transcription  
419 factor, is necessary and sufficient for sensory organ development in *Drosophila*.  
420 *Cell* 102, 349-362.
- 421 11. Amin, A., Li, Y., and Finkelstein, R. (1999). Hedgehog activates the EGF receptor  
422 pathway during *Drosophila* head development. *Development* 126, 2623-2630.
- 423 12. Chen, W., Huang, H., Hatori, R., and Kornberg, T.B. (2017). Essential basal  
424 cytonemes take up Hedgehog in the *Drosophila* wing imaginal disc. *Development*  
425 144, 3134-3144.
- 426 13. Nakano, Y., Guerrero, I., Hidalgo, A., Taylor, A., Whittle, J.R., and Ingham, P.W.  
427 (1989). A protein with several possible membrane-spanning domains encoded by  
428 the *Drosophila* segment polarity gene patched. *Nature* 341, 508-513.
- 429 14. Alexandre, C., Jacinto, A., and Ingham, P.W. (1996). Transcriptional activation of  
430 hedgehog target genes in *Drosophila* is mediated directly by the cubitus interruptus  
431 protein, a member of the GLI family of zinc finger DNA-binding proteins. *Genes*  
432 *Dev* 10, 2003-2013.
- 433 15. Pereira, P.S., Pinho, S., Johnson, K., Couso, J.P., and Casares, F. (2006). A 3' cis-  
434 regulatory region controls wingless expression in the *Drosophila* eye and leg  
435 primordia. *Dev Dyn* 235, 225-234.
- 436 16. Wartlick, O., Julicher, F., and Gonzalez-Gaitan, M. (2014). Growth control by a  
437 moving morphogen gradient during *Drosophila* eye development. *Development*  
438 141, 1884-1893.
- 439 17. Vollmer, J., Fried, P., Sanchez-Aragon, M., Lopes, C.S., Casares, F., and Iber, D.  
440 (2016). A quantitative analysis of growth control in the *Drosophila* eye disc.  
441 *Development* 143, 1482-1490.

- 442 18. Chen, Y., and Struhl, G. (1996). Dual roles for patched in sequestering and  
443 transducing Hedgehog. *Cell* 87, 553-563.
- 444 19. Incardona, J.P., Gruenberg, J., and Roelink, H. (2002). Sonic hedgehog induces  
445 the segregation of patched and smoothed in endosomes. *Curr Biol* 12, 983-995.
- 446 20. Torroja, C., Gorfinkiel, N., and Guerrero, I. (2004). Patched controls the Hedgehog  
447 gradient by endocytosis in a dynamin-dependent manner, but this internalization  
448 does not play a major role in signal transduction. *Development* 131, 2395-2408.
- 449 21. Gallet, A., and Therond, P.P. (2005). Temporal modulation of the Hedgehog  
450 morphogen gradient by a patched-dependent targeting to lysosomal compartment.  
451 *Dev Biol* 277, 51-62.
- 452 22. Casali, A. (2010). Self-induced patched receptor down-regulation modulates cell  
453 sensitivity to the hedgehog morphogen gradient. *Science signaling* 3, ra63.
- 454 23. Briscoe, J., and Therond, P.P. (2013). The mechanisms of Hedgehog signalling  
455 and its roles in development and disease. *Nat Rev Mol Cell Biol* 14, 416-429.
- 456 24. Nahmad, M., and Stathopoulos, A. (2009). Dynamic interpretation of hedgehog  
457 signaling in the *Drosophila* wing disc. *PLoS Biol* 7, e1000202.
- 458 25. Quan, X.J., Yuan, L., Tiberi, L., Claeys, A., De Geest, N., Yan, J., van der Kant, R.,  
459 Xie, W.R., Klisch, T.J., Shymkowitz, J., et al. (2016). Post-translational Control of  
460 the Temporal Dynamics of Transcription Factor Activity Regulates Neurogenesis.  
461 *Cell* 164, 460-475.
- 462 26. Callejo, A., Culi, J., and Guerrero, I. (2008). Patched, the receptor of Hedgehog, is  
463 a lipoprotein receptor. *Proc Natl Acad Sci U S A* 105, 912-917.
- 464 27. Sanchez-Higuera, C., and Hombria, J.C. (2016). Precise long-range migration  
465 results from short-range stepwise migration during ring gland organogenesis. *Dev*  
466 *Biol* 414, 45-57.
- 467 28. Jenett, A., Rubin, G.M., Ngo, T.T., Shepherd, D., Murphy, C., Dionne, H., Pfeiffer,  
468 B.D., Cavallaro, A., Hall, D., Jeter, J., et al. (2012). A GAL4-driver line resource for  
469 *Drosophila* neurobiology. *Cell reports* 2, 991-1001.
- 470 29. Pappu, K.S., Morey, M., Nern, A., Spitzweck, B., Dickson, B.J., and Zipursky, S.L.  
471 (2011). Robo-3--mediated repulsive interactions guide R8 axons during *Drosophila*  
472 visual system development. *Proc Natl Acad Sci U S A* 108, 7571-7576.
- 473 30. Bessa, J., and Casares, F. (2005). Restricted teashirt expression confers eye-  
474 specific responsiveness to Dpp and Wg signals during eye specification in  
475 *Drosophila*. *Development* 132, 5011-5020.
- 476 31. Schindelin, J., Arganda-Carreras, I., Frise, E., Kaynig, V., Longair, M., Pietzsch, T.,  
477 Preibisch, S., Rueden, C., Saalfeld, S., Schmid, B., et al. (2012). Fiji: an open-  
478 source platform for biological-image analysis. *Nat Methods* 9, 676-682.
- 479 32. Magri, M.S., Dominguez-Cejudo, M.A., and Casares, F. (2018). Wnt controls the  
480 medial-lateral subdivision of the *Drosophila* head. *Biol Lett* 14.
- 481 33. Gradilla, A.C., and Guerrero, I. (2013). Hedgehog on the move: a precise spatial  
482 control of Hedgehog dispersion shapes the gradient. *Curr Opin Genet Dev* 23, 363-  
483 373.
- 484 34. Frankfort, B.J., Nolo, R., Zhang, Z., Bellen, H., and Mardon, G. (2001). senseless  
485 repression of rough is required for R8 photoreceptor differentiation in the  
486 developing *Drosophila* eye. *Neuron* 32, 403-414.
- 487

488

489 **ACKNOWLEDGEMENTS:**

490 We thank T. Kornberg (UCSF), C. Sánchez-Higueras and J CG. Hombría (CABD), G.  
491 Struhl (Columbia Univ.) and J. Culí (CBMSO) for fly strains; A. Jarman (Univ. of  
492 Edinburgh), R. Holmgren (Northwestern Univ.), B. Hassan (ICM), R. Barrio (Biogune), X.  
493 Franch (IBE-UPF) and I. Guerrero (CBMSO) for antibodies; and the CABD ALMI platform  
494 for imaging and image analysis support. **Funding:** Research was funded through grants  
495 BFU2015-66040-P and MDM-2016-0687 (FC) and BFU2014-53299-P (DGM) from  
496 MICINN, Spain. **Authors' contributions:** FC conceived the study, acquired funding and  
497 managed the project; FC, DG-M and DGM designed research; DG-M carried out  
498 experimental work with the help of AI during the revision phase; TN devised the statistical  
499 tests and carried out statistical analyses; DGM acquired funding and developed model;  
500 FC, DG-M and DGM analyzed experimental and modeling results, FC drafted the  
501 manuscript and all authors contributed to the final manuscript. **Competing Interests:** All  
502 authors state they have no competing interests. **Data and Material availability:** all data is  
503 available in the manuscript or in the supplementary materials.

504  
505

## 506 **METHODS**

### 507 **Drosophila strains and genetic manipulations**

508 Hh:GFP (BAC) was used to monitor the expression for Hh protein[12]. *ato*<sup>1</sup> is an *atonal*  
509 mutant allele (Flybase), and *ato:GFP* is described in [25]. GAL4/UAS crosses were set up  
510 at 29°C to maximize GAL4-driven expression, except when indicated. The *hh-GAL4, UAS-*  
511 *GFP:Hh* strain was used as reporter for Hh expression[26]. Elav-Gal4 (Flybase) was used  
512 to drive *UAS-H2B-mCherry-P2A-eGFP-PH* line[27] in differentiated R cells, allowing the  
513 distinction between nuclei (mCherry) and cell membranes (eGFP) (experiment at 25°C).  
514 The FlyLight [28] GAL4 line R20D09 from *eya* (herein referred as EyaL-GAL4) was used to  
515 drive UAS transgenes specifically in the anterior and posterior ocellar competence

516 domains (ED1). GMRtdTom was used as a reporter of Glass to monitor the PRs cells and  
517 membranes [29]. UAS lines used were: UAS-nlsGFP (Flybase), UAS-Ci<sup>FL</sup> [14] and UAS-  
518 GFP-*ptc*Δloop2 (UAS-*ptc*DN)[2]. Quantification of number of R cells over-time was  
519 performed in the wild-type strain Oregon-R at 25°C. To perturb the normal distribution of  
520 Hh, a GFP-tagged Hh (UAS-GFP:Hh [20]) was driven with the *wg2.11-GAL4* strain  
521 (*wg2.11-GAL4; UAS-GFP:Hh*, or “*wg>Hh*”). *wg2.11* is an enhancer of the *wg* gene that is  
522 expressed surrounding the ocellar region and overlapping the prospective interocellar  
523 region in the eye imaginal disc (described in [15] and see results).

524

### 525 **Immunofluorescence**

526 Medium-late third instar larvae and pupae were dissected and fixed according to standard  
527 protocols. Immunostainings were performed as previously described [30]. We used the  
528 following primary antibodies: rabbit anti-GFP at 1:1000 (Molecular Probes), rat anti-RFP at  
529 1/500 (Chromotek), rabbit anti-βGal at 1:1000 (Cappel). Mouse anti-Eya 10H6 at 1:400, rat  
530 anti-Elav 7EBA10 at 1:1000 and mouse anti-Ptc at 1:100 were from the Developmental  
531 Studies Hybridoma Bank, University of Iowa (DSHB, <http://dshb.biology.uiowa.edu>).  
532 Aliquots of mouse anti-Sens at 1:250 were gifts from Andrew Jarman (the University of  
533 Edinburgh), Bassem Hassan (ICM, Paris), Rosa Barrio (Biogune, Leioa) and Xavier  
534 Franch (IBE-UPF, Barcelona), and rat anti-Ci 2A1 at 1:5 was a gift from Bob Holmgren  
535 (Northwestern University). Imaging was carried out on Leica SP2, SPE or SP5 confocal  
536 set-ups.

537

### 538 **Measurement of the Hh:GFP signaling gradient dynamics**

539 Eye discs from the BAC Hh:GFP strain were dissected from 96-130 hours after egg laying  
540 (grown at 25°C) and stained simultaneously. Number of discs per experiment was >10 and  
541 one representative example was shown. Developmental stage was determined as number

542 of ommatidial rows in the region of the compound eye. Imaging was carried out in a Leica  
543 SP5 confocal setup with the same settings. Lasers were previously warmed up during 1h.  
544 Fluorescence Intensity measurements were obtained with Fiji [31] by selecting a ROI  
545 across the ocellar complex. Then a Plot Profile was generated for the ROI and the  
546 quantitative data obtained were processed in Excel.

547

548 **R cell recruitment over-time.** Medium-late third instar OR-R larvae and pupae were  
549 dissected and stained with anti-Elav to monitor the degree of differentiation from the stage  
550 17 ommatidia to stage 27 ommatidia. The total number of samples quantified was 83 for  
551 both ocelli. Samples per time point ranged from five to 12. To analyze the correlation of the  
552 number of ocellar photoreceptors cells (Rs) and developmental time, as measured by the  
553 number of ommatidia rows in the compound eye, we performed an univariate linear  
554 regression, using the formula:

$$Y = \beta_0 + \beta_1 X + \varepsilon ; \varepsilon \sim N(0, \sigma^2),$$

555 where Y is the number of R cells; X is the number of ommatidial rows in the compound  
556 eye;  $\beta_0$  is the intercept coefficient;  $\beta_1$  is the number of ommatidial row coefficient and  $\varepsilon$  is  
557 the regression error. The model was estimated by the least squares method using *lm()*  
558 function in *Rsoftware* and validated checking for normality, independence and  
559 homoscedasticity of residuals. The analysis shows a statistically significant linear  
560 dependence between PR cell number and developmental time, either when considering  
561 PR cell number of the anterior or the posterior ocelli individually or aggregating the data  
562 from both ocelli. The table below summarizes the statistics results of the linear regression.

|                        | <b>pOC</b> | <b>aOC</b> | <b>pOC+aOC</b> |
|------------------------|------------|------------|----------------|
| <i>Coef. Estimated</i> | 2.8067     | 1.039      | 3.8386         |
| <i>Coef. p-value</i>   | <2e-16     | 2.39E-15   | <2e-16         |
| <i>R-squared</i>       | 0.7722     | 0.5995     | 0.7794         |

|                           |         |           |           |
|---------------------------|---------|-----------|-----------|
| <i>Adjusted R-squared</i> | 0.7689  | 0.5937    | 0.7762    |
| <i>Model p-value</i>      | 2.2E-16 | 2.391E-15 | < 2.2e-16 |

563

564 Source data for Figure 2D is available as supplementary material (SD\_Figure2\_A'\_D).

565

566 **Quantification of adult ocelli R cell number.** Brain preparations, with the ocelli attached,  
567 were dissected from newly hatched (0-1 days) adults and stained with anti-Elav and  
568 counterstained with Rhodamine-phalloidin (cell membranes) and DAPI (nuclei). Ocelli  
569 were imaged as z-stacks on an SPE Leica confocal setup and reconstructed using Imaris  
570 (Bitplane) for quantification.

571

572 **Spatial statistics of Elav and Sens pattern under normal and perturbed Hh**  
573 **distribution.** We imaged as confocal z-stacks ocellar regions stained for Sens and Elav  
574 from control (Oregon-R strain; N=19) or *wg2.11>GFP:Hh* (N=18), in the range of 18-23  
575 ommatidia stage. Three cell states can be observed: 1: [Sens-, Elav+], 2: [Sens(weak),  
576 Elav(weak)] and 3: [Sens+, Elav-] that correspond to differentiating photoreceptors, the  
577 transition between precursors and photoreceptors, and precursors, respectively. To obtain  
578 a bidimensional description of the distribution of these cells types in the tissue, we  
579 superimposed an orthogonal grid (ImageJ: Analyze>Tools>Grid) on a maximal projection  
580 of the z-stack sections comprising all Sens and Elav signals. The grid's cell size is set to  
581 correspond approximately to the size of a cell's nucleus, so that, in general there is only  
582 one nucleus per grid's cell. When a nucleus spans two or more cells in the grid, its position  
583 is allocated to the grid's cell where most of the signal is. Then, a 1, 2 or 3 is assigned to  
584 each grid cell according to its Sens and Elav signal. A grid cell with no signal is assigned a  
585 "0". The result is a two-dimension matrix of positions of the three states per sample (Figure  
586 3\_Figure S1).

587

588 **Statistical analysis of Elav and Sens expression patterns.**

589 In order to test the departure from a random pattern of Sens and Elav expression we  
590 defined two statistics: “grouping” and “polarity”. Importantly, the degree of polarization will  
591 tell whether the pattern is compatible with a wave-like organization. For the analysis, each  
592 matrix comprising 1, 2 and 3 cell types (Elav+Sens-, Elav+Sens+ and Elav-Sens+,  
593 respectively) is split into two matrices, one in which 2 is identified as 1 and another in  
594 which 2 is identified as 3, since “2” is expression of 1 and 3 in the same cell. This allows a  
595 straightforward statistical analysis.

596 “Grouping” is defined as the departure from a random proportion of neighbors of a given  
597 type for each cell expressing Elav or Sens. For each cell  $i$ , the proportion of Elav or Sens-  
598 expressing neighbors,  $p_i$  is calculated as

$$p_i = \frac{s_i}{n_i}$$

599 where  $s_i$  is the number of neighbors of a given type and  $n_i$  is the total number of  
600 neighbors (note that this number will depend on the position of the cell within the matrix,  
601 with cells in the center with more neighbors (8) than if in the periphery). Grouping is a  
602 global property of the ocellus so the estimation of grouping for the whole ocellus could be  
603 reduce to count the number of Elav or Sens expressing cells relative to total cells in the  
604 neighborhood:

$$P = \frac{\sum_i s_i}{\sum_i n_i}$$

605 However, this grouping is strictly dependent on the proportion of Elav or Sens in the  
606 ocellus, so in order to obtain an unbiased measure of grouping the total proportion of cells  
607 expressing a factor needs to be subtracted from the proportion of this factor in the  
608 neighborhood. As a correction of the statistic thus defined we actually consider the total  
609 proportion as:

$$S - 1 / N - 1$$

610 Where S is the total number of cells expressing the factor in the ocellus and N the total  
611 number of cells in it. We have to subtract 1 from the numerator and denominator because  
612 each time we calculate the proportion of neighbors, we focus non-randomly on a cell  
613 expressing the factor (effectively we are “removing” one case from the sample) so the  
614 proportion of success in the neighborhood that can be expected in a random matrix would  
615 be lower than the actual proportion. Then, grouping of cells of the same type is expressed  
616 as follows:

$$grouping(x) = P(x) - \frac{S_x - 1}{N - 1}$$

617

618 Where x is the expressed factor, Elav or Sens.

619 However, if we consider grouping of Elav around Sens or Sens around Elav making the  
620 previous correction is not needed, because this time the expected proportion of success in  
621 the neighborhood in a random matrix coincides with the total proportion in the ocellus, so  
622 for the case of grouping of cells of one type (y) around a cell of the other type (x), the  
623 grouping would be defined as:

$$grouping(x, y) = P(x, y) - \frac{S_y}{N}$$

624 Where x is the expressed factor in a cell, and y is the other factor, expressed in the cell's  
625 neighborhood.

626

627 “Polarity” measures the ordered succession of cells states along a spatial axis. In our  
628 case, it is the “proximodistal” axis with “proximal” defined as the position closest to the  
629 endogenous Hh source. For each matrix and each factor it is possible to define a  
630 dichotomous response variable Y which classifies a cell as expressing a factor, 1, or not,



631 0. So we can define a logistic regression model to predict the expression of this factor in a  
632 cell using column position,  $X$ , as predictor:

$$633 \text{Logit}(Y) \sim \beta_0 + \beta_1 X$$

634 The hypothesis for Elav is that its expression will be “proximal”, that is the left or first  
635 column, whereas Sens will be “distal”, that is the right or last column, so after the  
636 estimation of the model for each factor we will use these models to predict the probability  
637 of finding ELAV at the first column and Senseless at the last one. The following expression  
638 defines them:

$$639 \text{If } \alpha = \text{Elav} \quad \text{Polar}(\alpha) = P(Y = 1|X = 1)$$

$$640 \text{If } \alpha = \text{Sens} \quad \text{Polar}(\alpha) = P(Y = 1|X = n)$$

641 where  $n$  is number of columns in the matrix and  $\alpha$  the factor used.

642 This probability has to be compared with the probability of finding expression of  $\alpha$  at that  
643 column randomly or what is the same with no predictor used, which coincides again with  
644 the total proportion of the factor in the matrix. Polarity is then defined as follows:

$$\text{Polarity}(\alpha) = \text{Polar}(\alpha) - \frac{S_\alpha}{N}$$

645 Where  $S_\alpha$  is the number of cells expressing the factor and  $N$  the number of cells in the  
646 matrix.

647 Groups comparison: For each matrix 4 measures of “grouping” and 2 of “polarity” were  
648 estimated:

$$\text{grouping}(\text{Elav}) ; \text{grouping}(\text{Sens}) ; \text{grouping}(\text{Elav}, \text{Sens}) ; \text{grouping}(\text{Sens}, \text{Elav})$$

$$649 \text{Polarity}(\text{Elav}) ; \text{Polarity}(\text{Sens})$$

650 Then they were calculated for every matrix and plotted (Figure 3-Figure S1). In order to  
651 test for significant grouping differences between control and  $wg>Hh$ , a Welch’s test for  
652 unequal variances was performed for each grouping variable:

$$\begin{cases} H_0 : \mu_1 = \mu_2 \\ H_1 : \mu_1 \neq \mu_2 \end{cases}$$

653

654 Since we aimed at testing if there was a pattern of Elav and Sens expression, we had to  
655 check that they were not distributed randomly, so grouping should be larger than 0. A  
656 Student's t-test for each grouping distribution and experimental group, control or  $wg>Hh$ ,  
657 was performed:

$$\begin{cases} H_0 : \mu \leq 0 \\ H_1 : \mu > 0 \end{cases}$$

658

659 The same hypothesis was posed and the same test performed for polarity, first to check if  
660 these groups were significantly different from one another and then to check if the polarity  
661 was larger than 0.

662 Statistics and data treatment were performed in R software. Data matrices were imported  
663 to R from .csv.

664

### 665 **Adult cuticles dissections**

666 The dorsal head capsules were dissected in PBS1X. Brain tissues and proboscis were  
667 removed from the samples. All the structures were incubated overnight in Hoyer's:Lactic  
668 Acid (1:1) solution at 80°C [32]. Imaging was carried out on a Leica DM500B microscope  
669 with a Leica DFC490 digital camera. All images were processed with Fiji [31].

670

### 671 **Modeling the Hh pathway in the *Drosophila* ocelli**

672 Simulations were performed using an in-house computational script developed in Matlab®  
673 (The Mathworks). This script is available as source code  
674 (SD\_Figure4\_script\_Hhpathwaymodel). Equations are discretized in space and time using  
675 an Euler approach, with adimensional concentrations but dimensional variables in space

676 and time. The model is based on a hybrid approach that combines partial differential  
677 equations (PDEs) solved in a continuous space and ordinary differential equations (ODEs)  
678 that are solved in a discrete space. The PDEs account for the diffusive extracellular  
679 signals, while the ODEs account of the intracellular reactions. Cells are simulated as two-  
680 dimensional regions in a hexagonal Voronoi diagram, with cell-to-cell variability introduced  
681 as gamma-distributed values for each of the kinetic constants of the reactions involved,  
682 with a standard deviation of 20% of the mean value.

683 The equations define a simplified representation of the Hh signaling pathway, illustrated in  
684 Figure 3. The set of interactions that the model takes into account are the following:

685

686 Diffusion of the Hedgehog (Hh) morphogen:

687 Hh is secreted by producing cells in the intervening region between the anterior and  
688 posterior ocellar competent regions (“Hh source”) and then disperses generating a  
689 concentration gradient. The mechanism by which Hh disperses is not totally understood,  
690 and several studies propose that Hh travels through cytonemes[33] as an alternative to  
691 diffusion. Overall, the highly noisy spatiotemporal profile of Hh distribution in the ocellus  
692 (Figure 4-Figure S1A) can be fitted with a polynomial that decreases non-linearly when  
693 moving away from the Hh source. Our model simplifies the details of Hh transport as two-  
694 dimensional diffusion. This approach successfully reproduces the experimental data of  
695 shape and dynamics of the Hh profile (see Figure S3). The equation that governs Hh  
696 dynamics is:

697

$$698 \frac{\partial Hh(x, y, t)}{\partial t} = D \cdot \left( \frac{\partial^2 Hh(x, y, t)}{\partial x^2} + \frac{\partial^2 Hh(x, y, t)}{\partial y^2} \right) \quad (1)$$

699

700 Our model approximates the Hh source as a continuous supply of Hh at one of the

701 boundaries of the ocellus. The experimental data shows that Hh expression by the Hh-  
702 producing cells cells, monitored by a Hh:GFP BAC, gradually decreases to 50% of its  
703 initial values during the period through which cell differentiation is taking place. This is  
704 introduced in our model as a continuous reduction in the Hh production rate at the  
705 production boundary to around 50% of its initial value. However, similar computational  
706 results are obtained if the Hh production rate is maintained constant (see Figure 4-Figure  
707 S2). Source data for Hh:GFP profile quantification is available as supplementary  
708 information (SD\_Figure4\_S3A'\_B').

709

#### 710 Binding of Hh to its receptor Ptc:

711 Hh binds to its receptor Ptc irreversibly to form a complex (*Ptc-Hh*)[19-21], following the  
712 scheme:

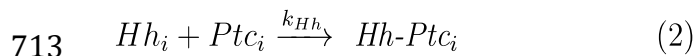

714 Where  $k_{Hh}$  corresponds to the affinity rate constant of the interaction.  $Hh_i$  corresponds to  
715 the amount of Hh that a given cell  $i$  is receiving, computed at each time step as the  
716 average value of Hh over the whole cell area of cell  $i$ . In this way, the continuous value of  
717 Hh computed in Eq. 1 is converted to a discrete value for each cell in the population  $Hh_i$ .  
718 This value is then used to compute the amount of Hh that binds to Ptc via Eq. 2 as an  
719 ODE that is solved for each cell in the hexagonal lattice:

$$720 \quad \frac{\partial Hh_i(t)}{\partial t} = -k_{Hh} \cdot Ptc_i(t) \cdot Hh_i(t) \quad (3)$$

721

722 This ODE equation is then solved continuously in time but discretely in space, i.e., for each  
723 cell  $i$  in the population. Then, the amount of Hh molecules consumed by each cell  $i$  in each  
724 particular position is subtracted from the continuous spatial variable Hh in the  
725 corresponding position. The resulting Hh profile is then computed at the next time step via

726 Eq. 1.

727 Expression of Ptc and binding to Hh:

728 The amount of Hh that reaches a given cell in the population interacts with the free form of  
729 its receptor, Ptc. In the absence of Hh, free Ptc acts, indirectly through inhibition of the  
730 signal transducer Smo, as a repressor of Hh signaling target genes. This repression is set  
731 in the model as sigmoidal function of Ptc, with cooperativity  $m=3$  (slightly higher or lower  
732 values of  $m$  also reproduce the experimental results). Since one of Hh targets is Ptc itself,  
733 the sigmoidal repression is introduced in the equation corresponding to Ptc, forming a  
734 direct negative feedback loop. In addition, a constant degradation of Ptc is introduced to  
735 ensure a dynamic equilibrium in its concentration. Taking this into account, the dynamics  
736 of Ptc is described by the following ODE:

$$737 \frac{\partial Ptc_i(t)}{\partial t} = \frac{\alpha_i \cdot A_i^m}{Ptc_i(t) + A_i^m} - k_{Hh} \cdot Ptc_i(t) \cdot Hh_i(t) - \frac{\beta_i \cdot Ptc_i(t) \cdot Elav_i^m(t)}{Elav_i^m(t) + C_i^m} \quad (4)$$

738 where  $\alpha$  and  $\beta$  corresponds to the rate constant for production and degradation.  $A$   
739 corresponds to the half maximal concentration of the sigmoidal curve, and  $m$  sets the  
740 slope of the sigmoidal. The next term accounts for the binding of Ptc and Hh, following Eq  
741 2.

742 The second version of the model includes a reduction of available (“free”) Ptc in terminally  
743 differentiated photoreceptors. This is simplified in the model by adding the last term in Eq.  
744 4 in the form of a Hill function dependent on *Elav*, a marker of photoreceptor (“R”) fate.

745

746 Expression of Senseless (Sens):

747 One of the relevant Hh signaling pathway targets (albeit likely indirect) is *senseless*  
748 (*Sens*), a Zn-finger transcription factor required for ocellar photoreceptor differentiation  
749 downstream of the proneural gene *atonal* [10, 34]. Our model described the dynamics of  
750 expression of *Sens* by the following ODE:

751

$$\frac{\partial Sens_i(t)}{\partial t} = \frac{\alpha_i \cdot C_i^m}{Ptc_i^m(t) + C_i^m} \cdot \frac{A_i^m}{Elav_i^m(t) + A_i^m} - \beta_i \cdot Sens_i(t) \quad (5)$$

753

754 where the expression of *Sens* is mediated by simple direct repression by *Ptc*, where the  
755 half maximal concentration of the sigmoidal correspond to *B*. In addition, we have  
756 observed that during ocellar differentiation *Sens* expression is also lost in terminally  
757 differentiated photoreceptors. We represent this loss of *Sens* expression in the models as  
758 a direct repression by *Elav* in each cell *i*. To make this repression stronger than the  
759 repression by *Ptc*, the second term is elevated again to *m*.

760

761 Differentiation into a terminal photoreceptor cell:

762 The events downstream of *Sens* that result in a terminally differentiated photoreceptor cell  
763 are also simplified in a single activation of the *Elav* gene. Its expression is assumed as  
764 directly proportional to the amount of *Sens*, with a sigmoidal degradation of *Elav*.  
765 Therefore, the equation for the dynamics of *Elav* takes the form:

766

$$\frac{\partial Elav_i(t)}{\partial t} = \frac{\alpha_i \cdot Sens_i^m(t)}{Sens_i^m(t) + B_i^m} \quad (6)$$

768

769 Once the concentration of *Elav* reaches a given threshold value in a cell *i*, the model  
770 assumes an irreversible transition to a differentiated photoreceptor.

Figure 1 García-Morales et al.

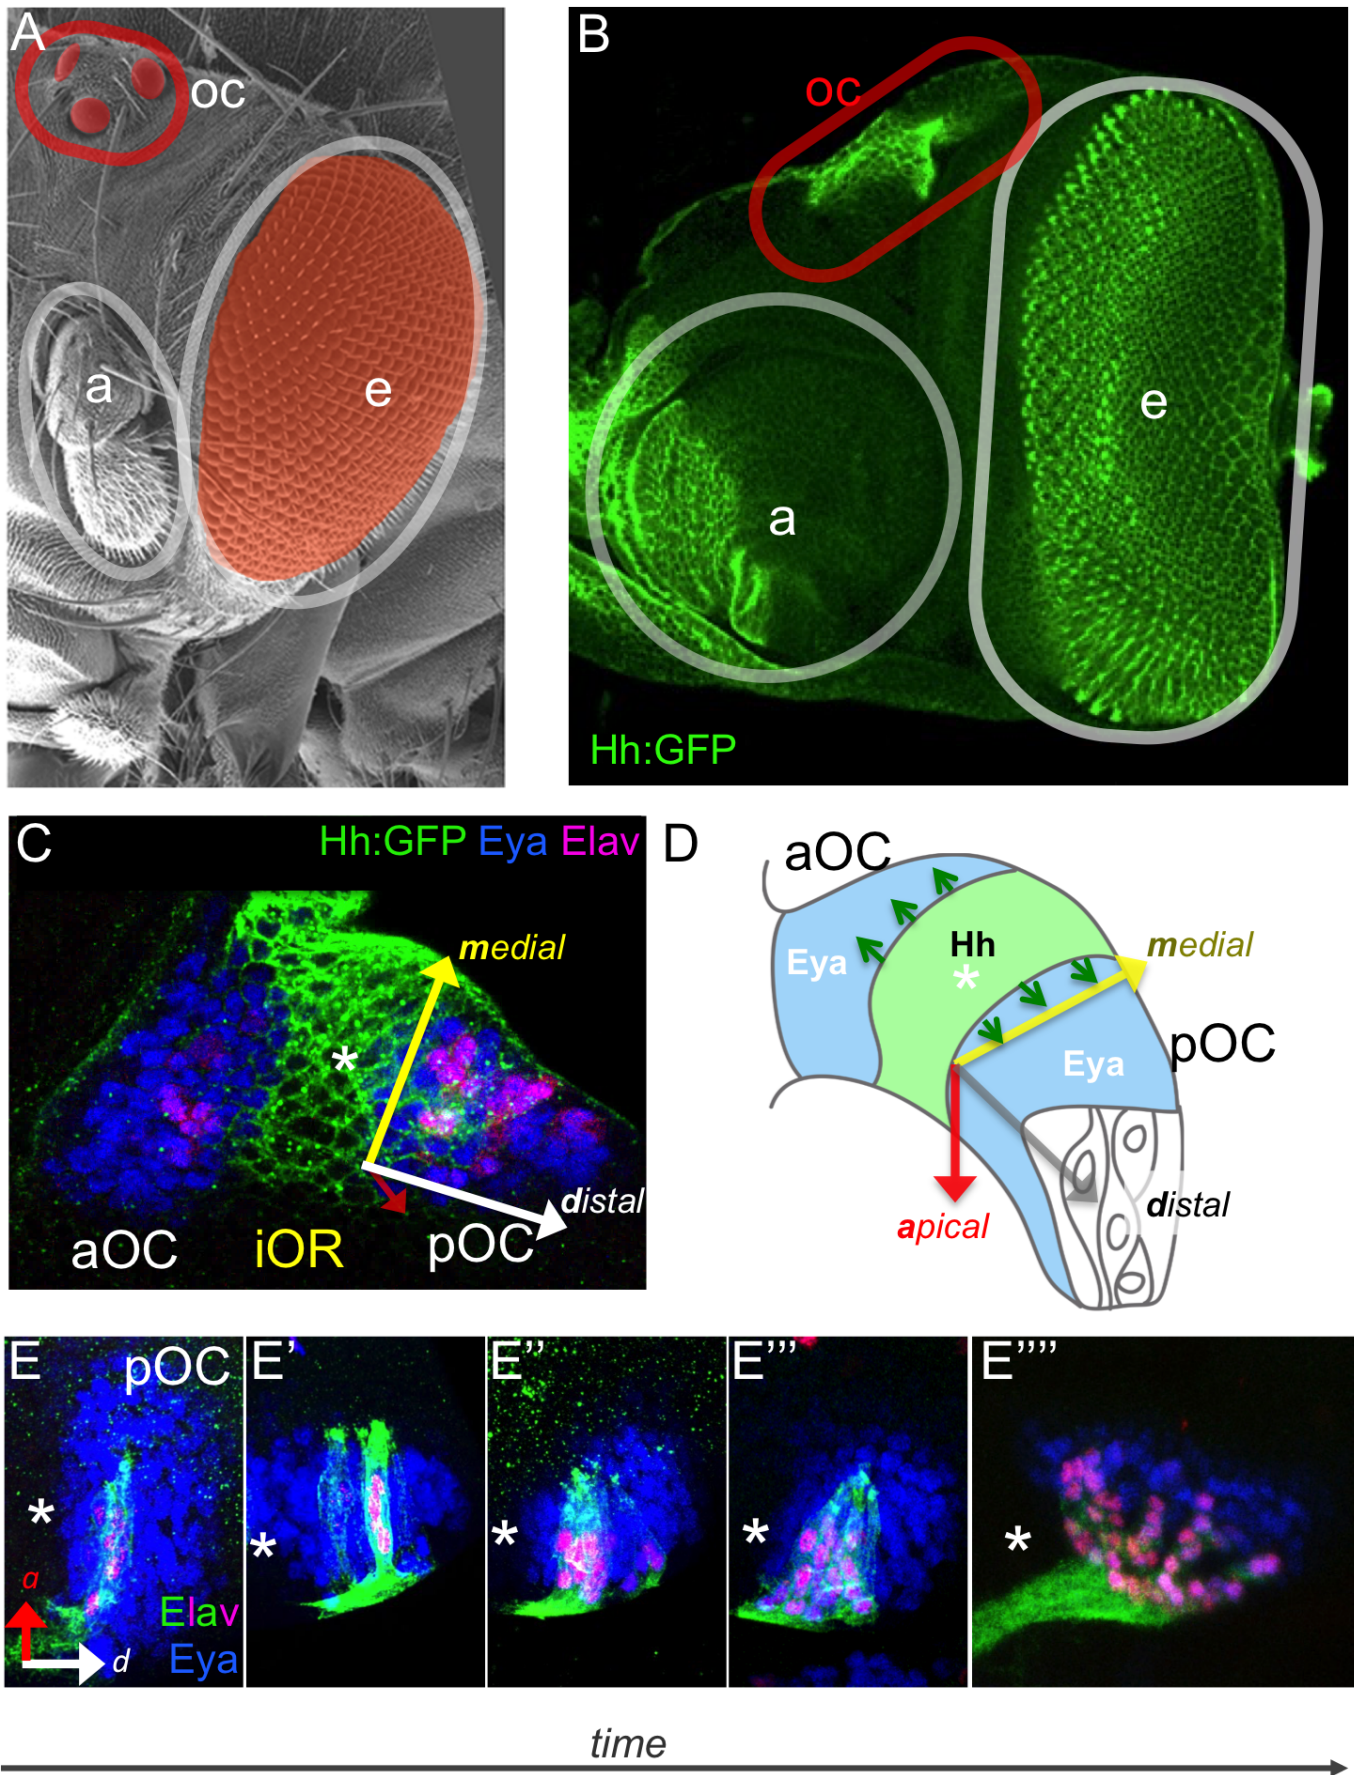

Figure 1 S1. García-Morales et al.

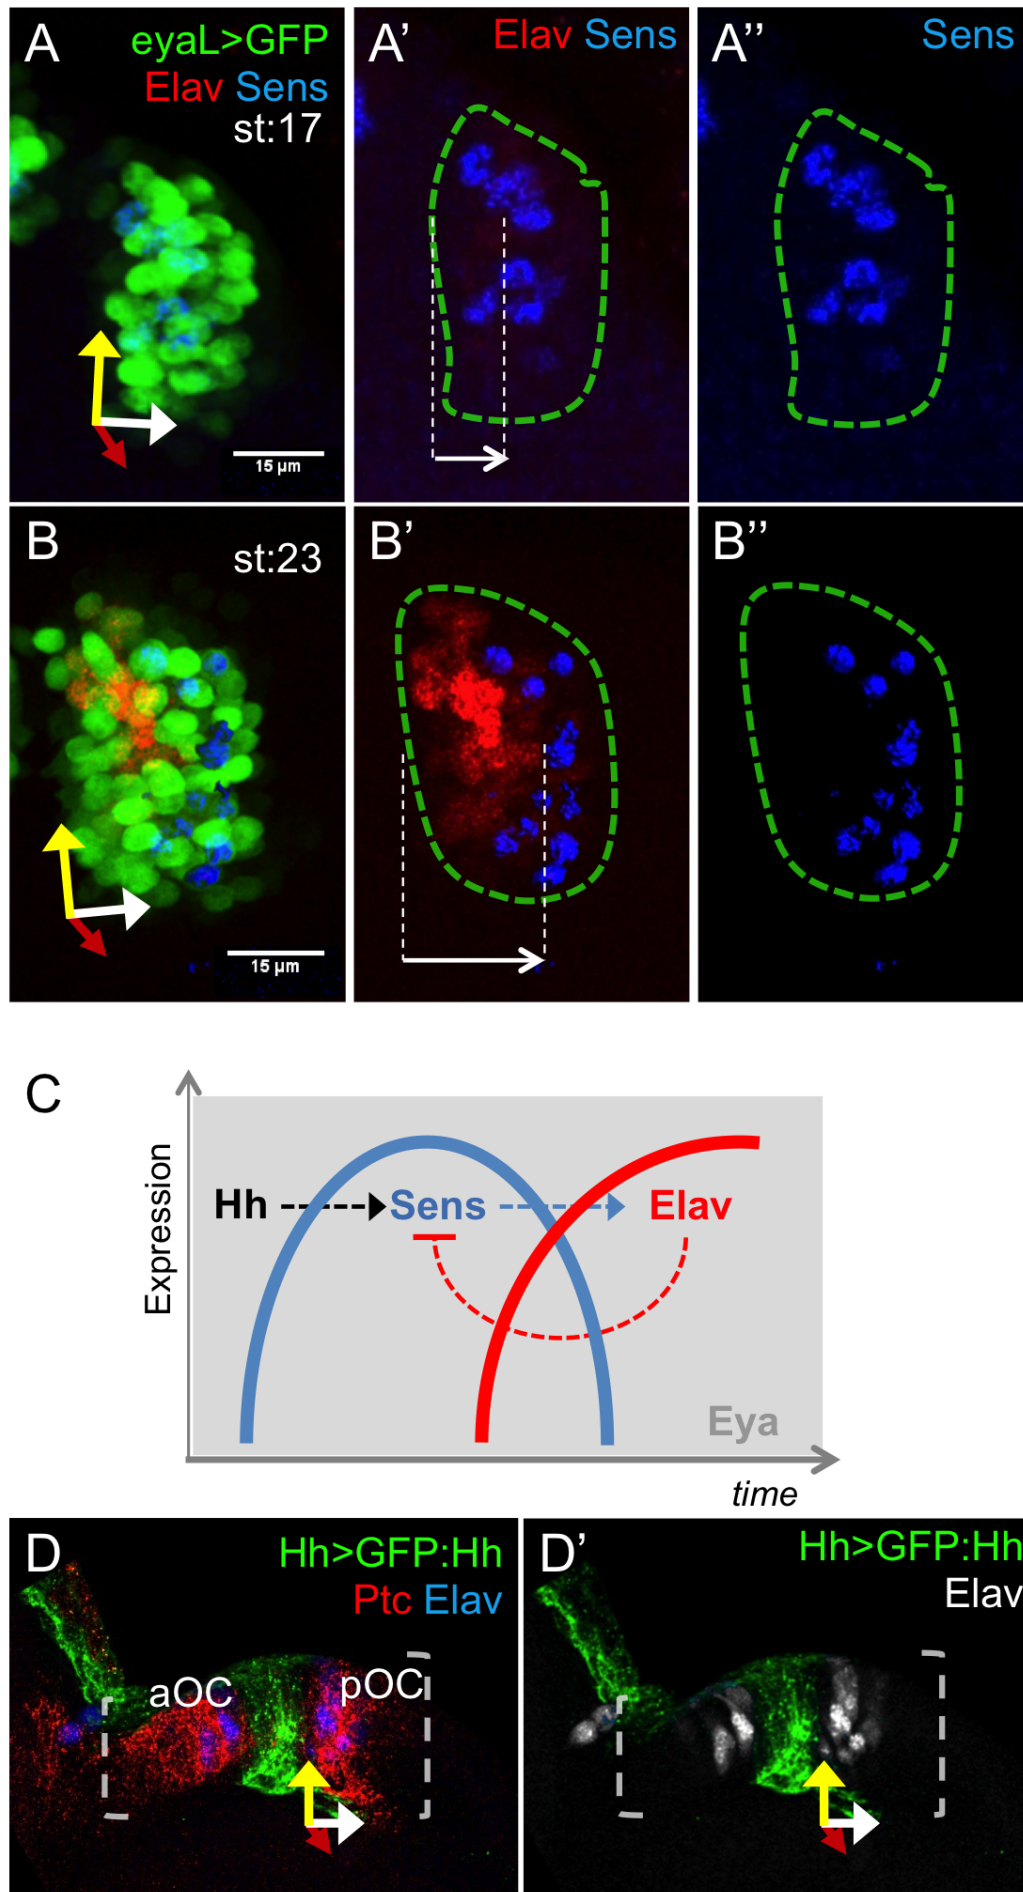



Figure 2 García-Morales et al.

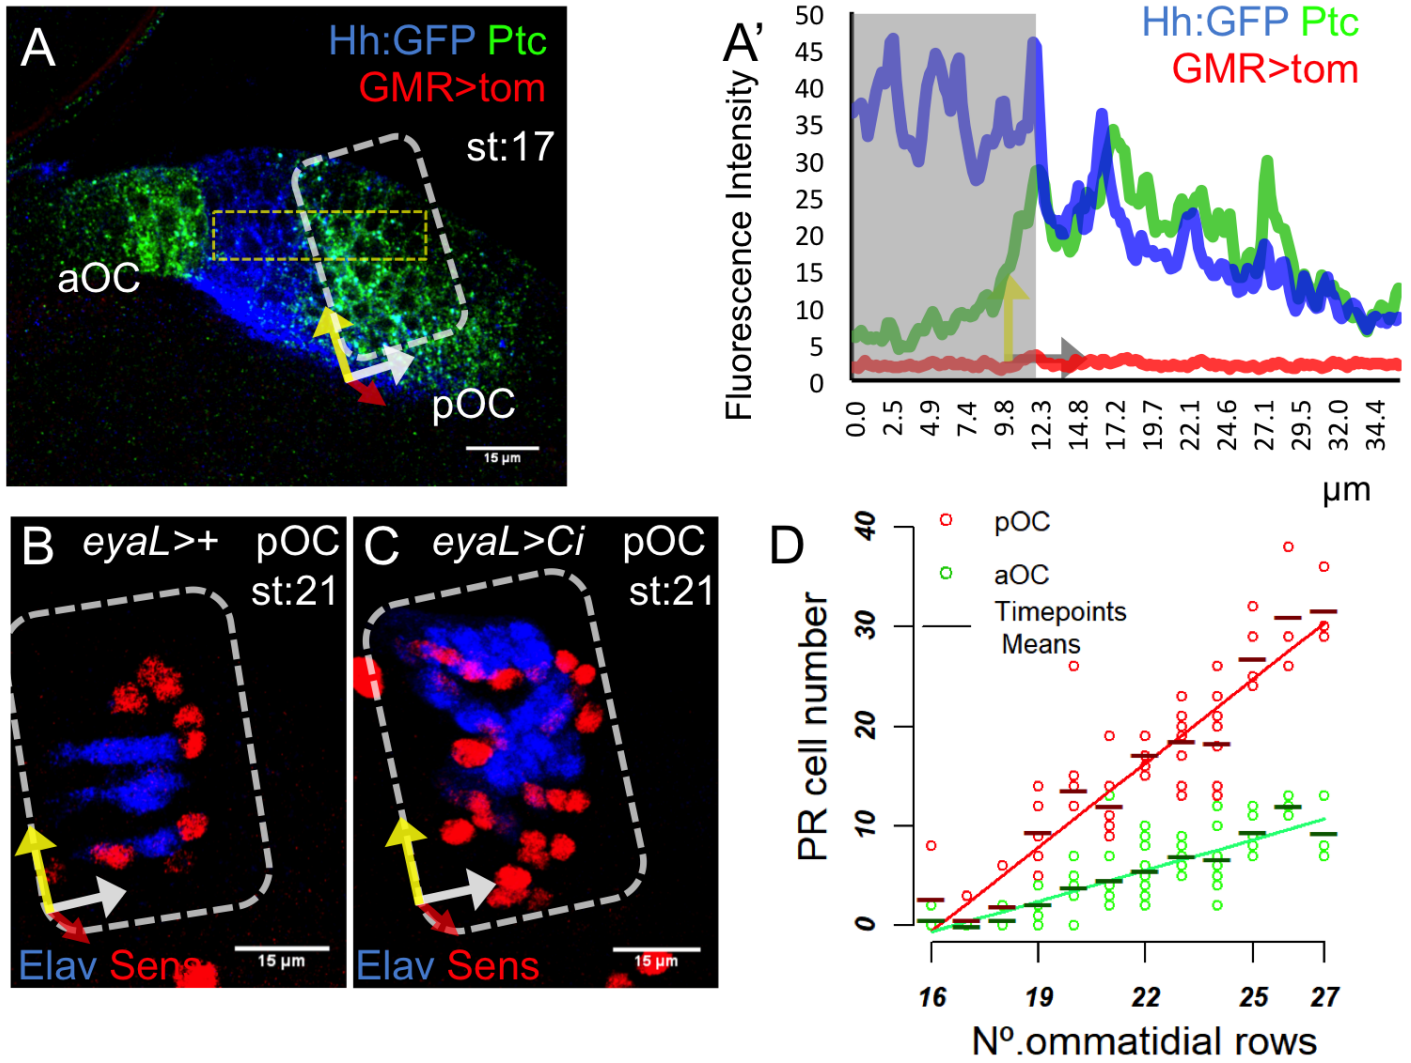

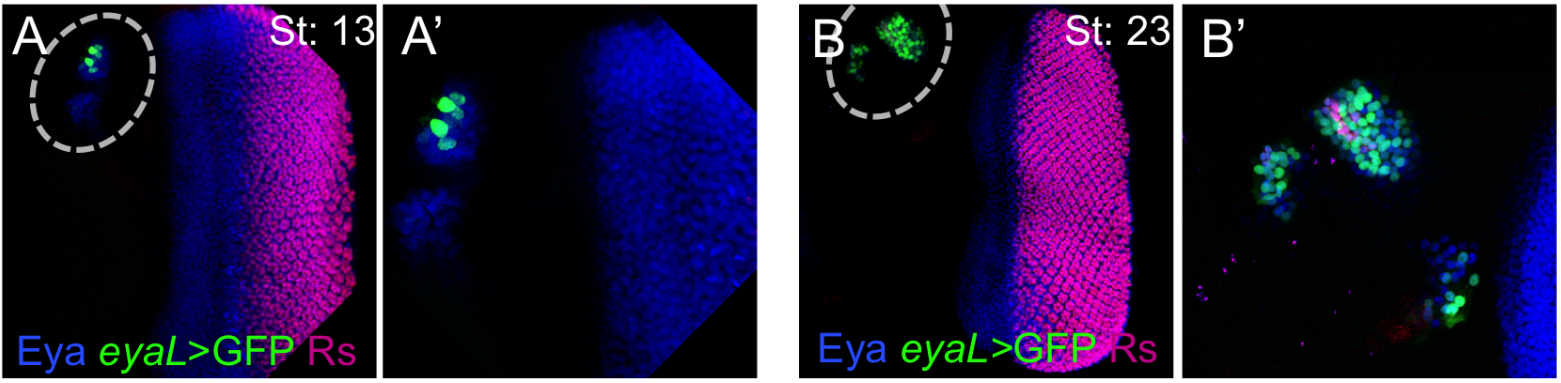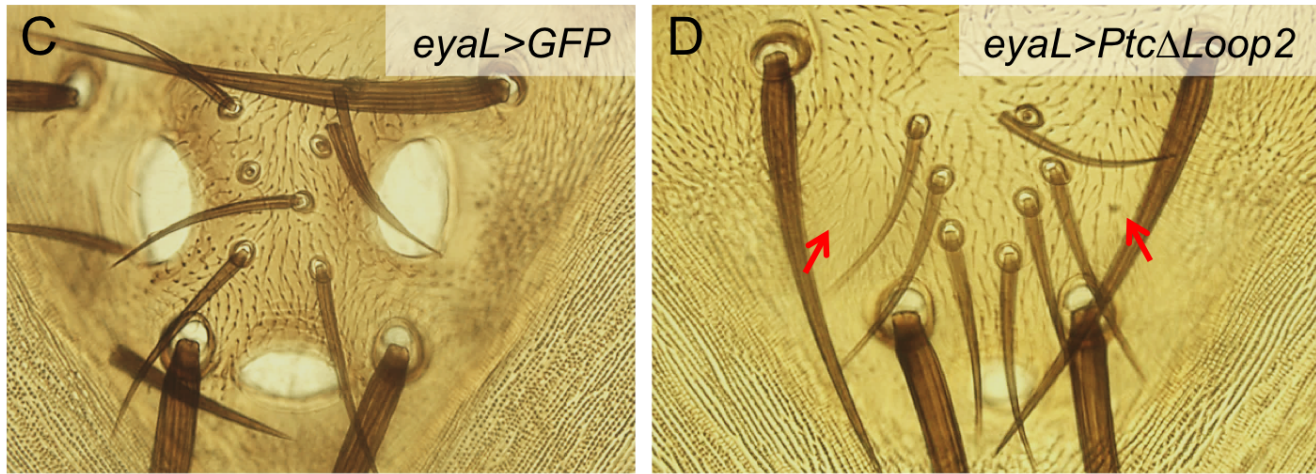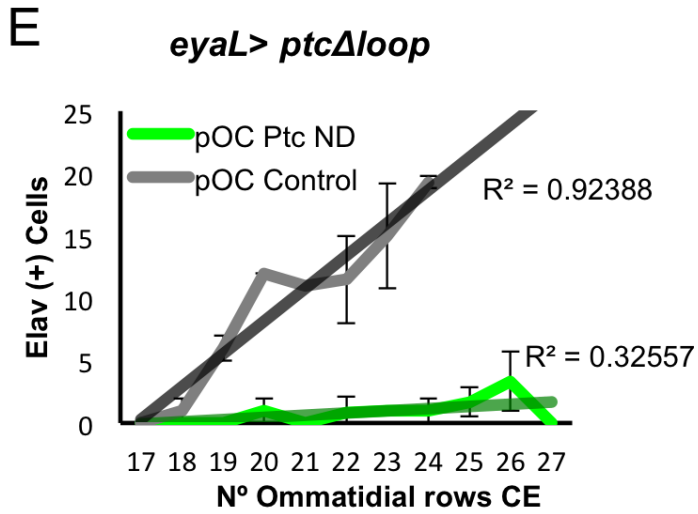

Figure 3 García-Morales et al.

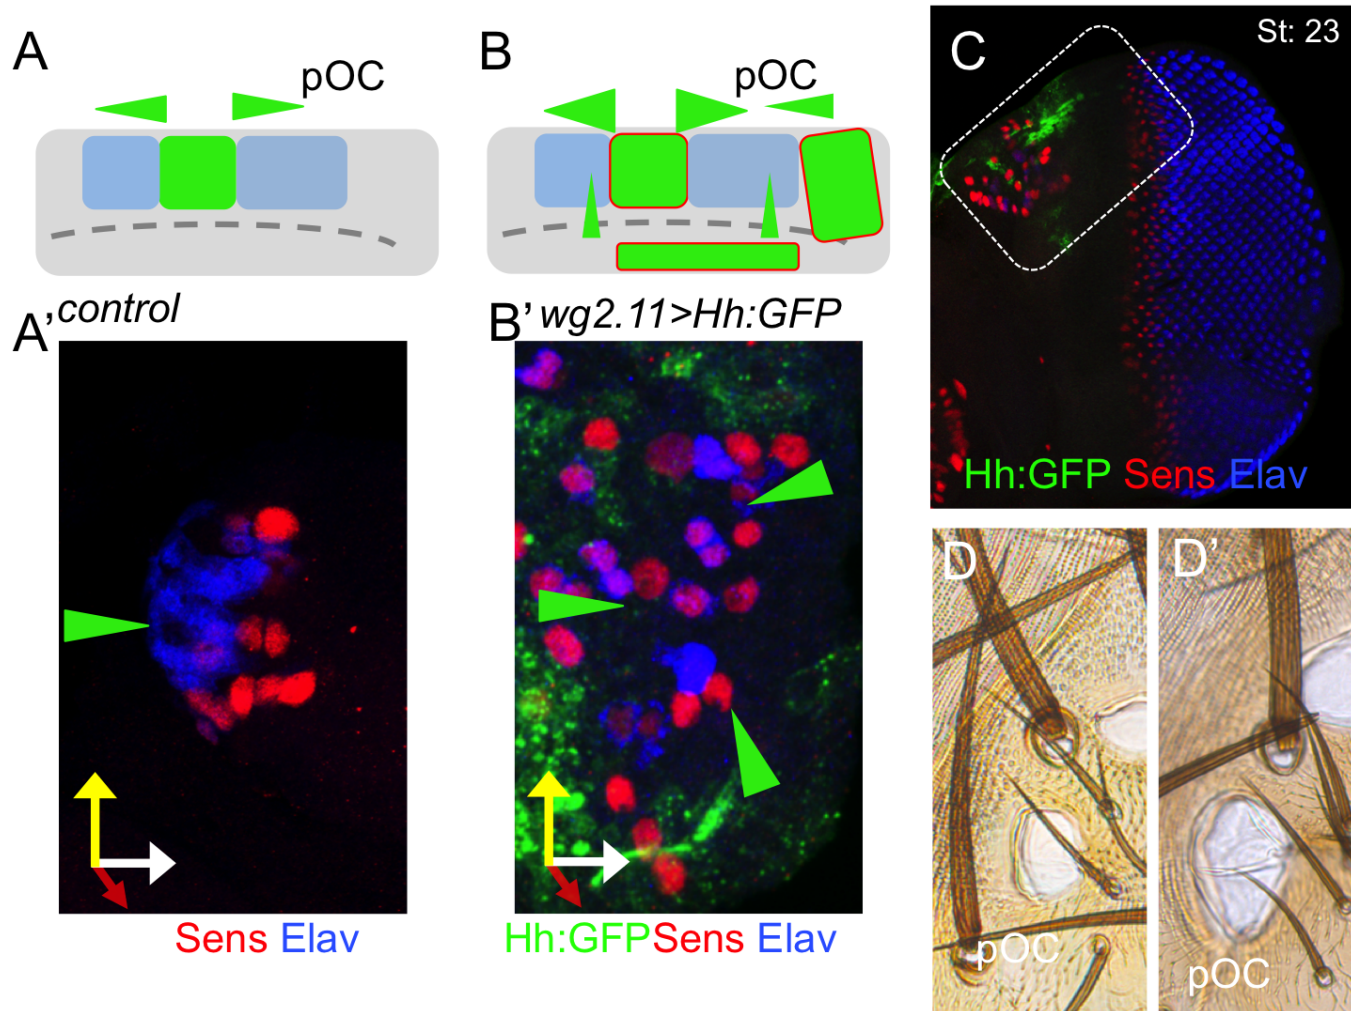

Figure 3 S1. García-Morales et al.

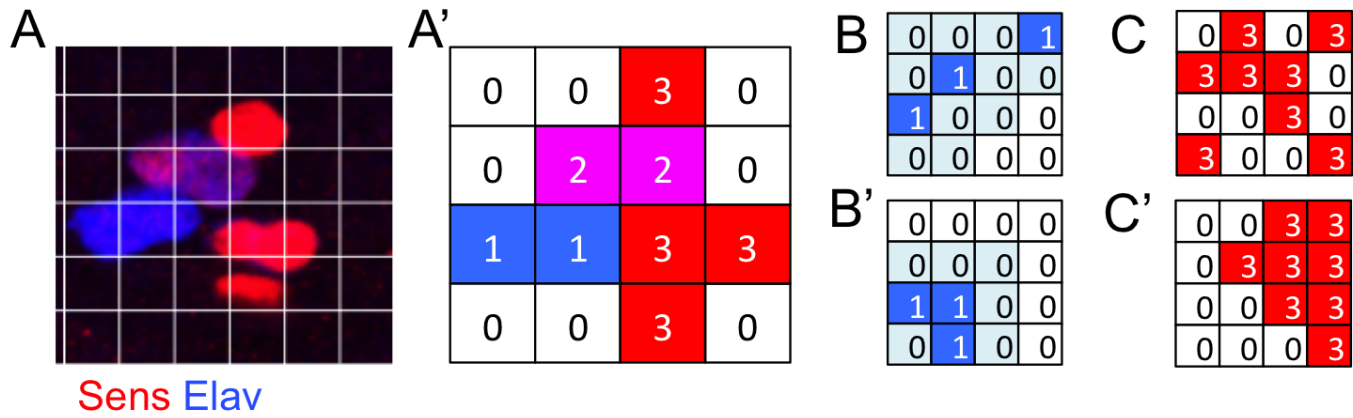

**D**

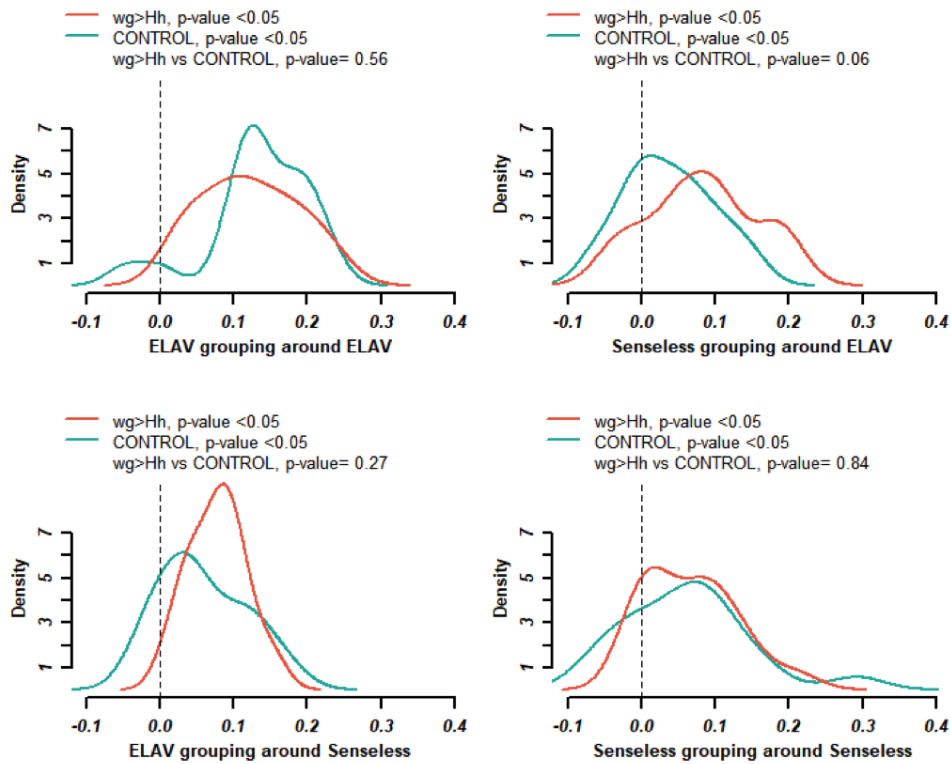

**E**

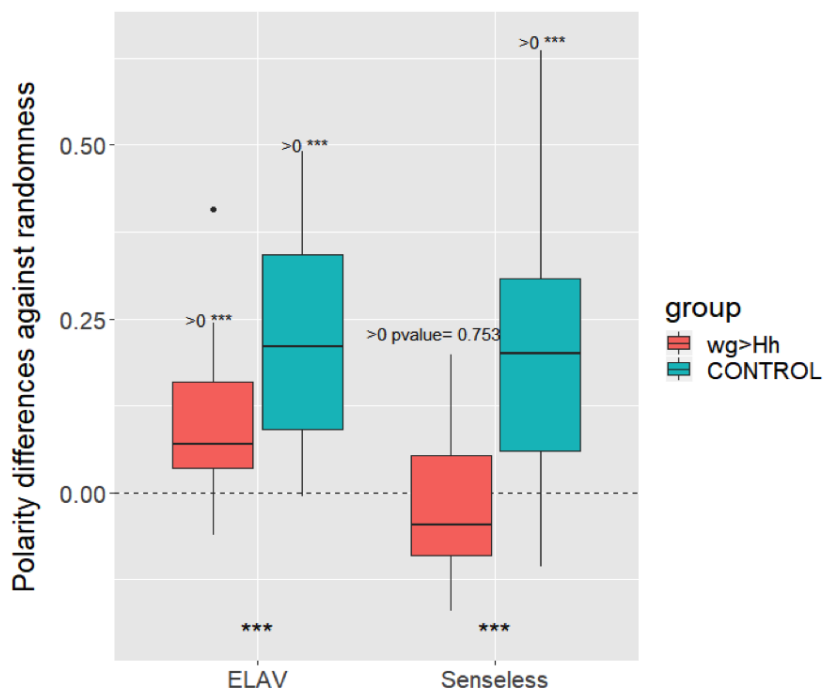

Figure 4 García-Morales et al.

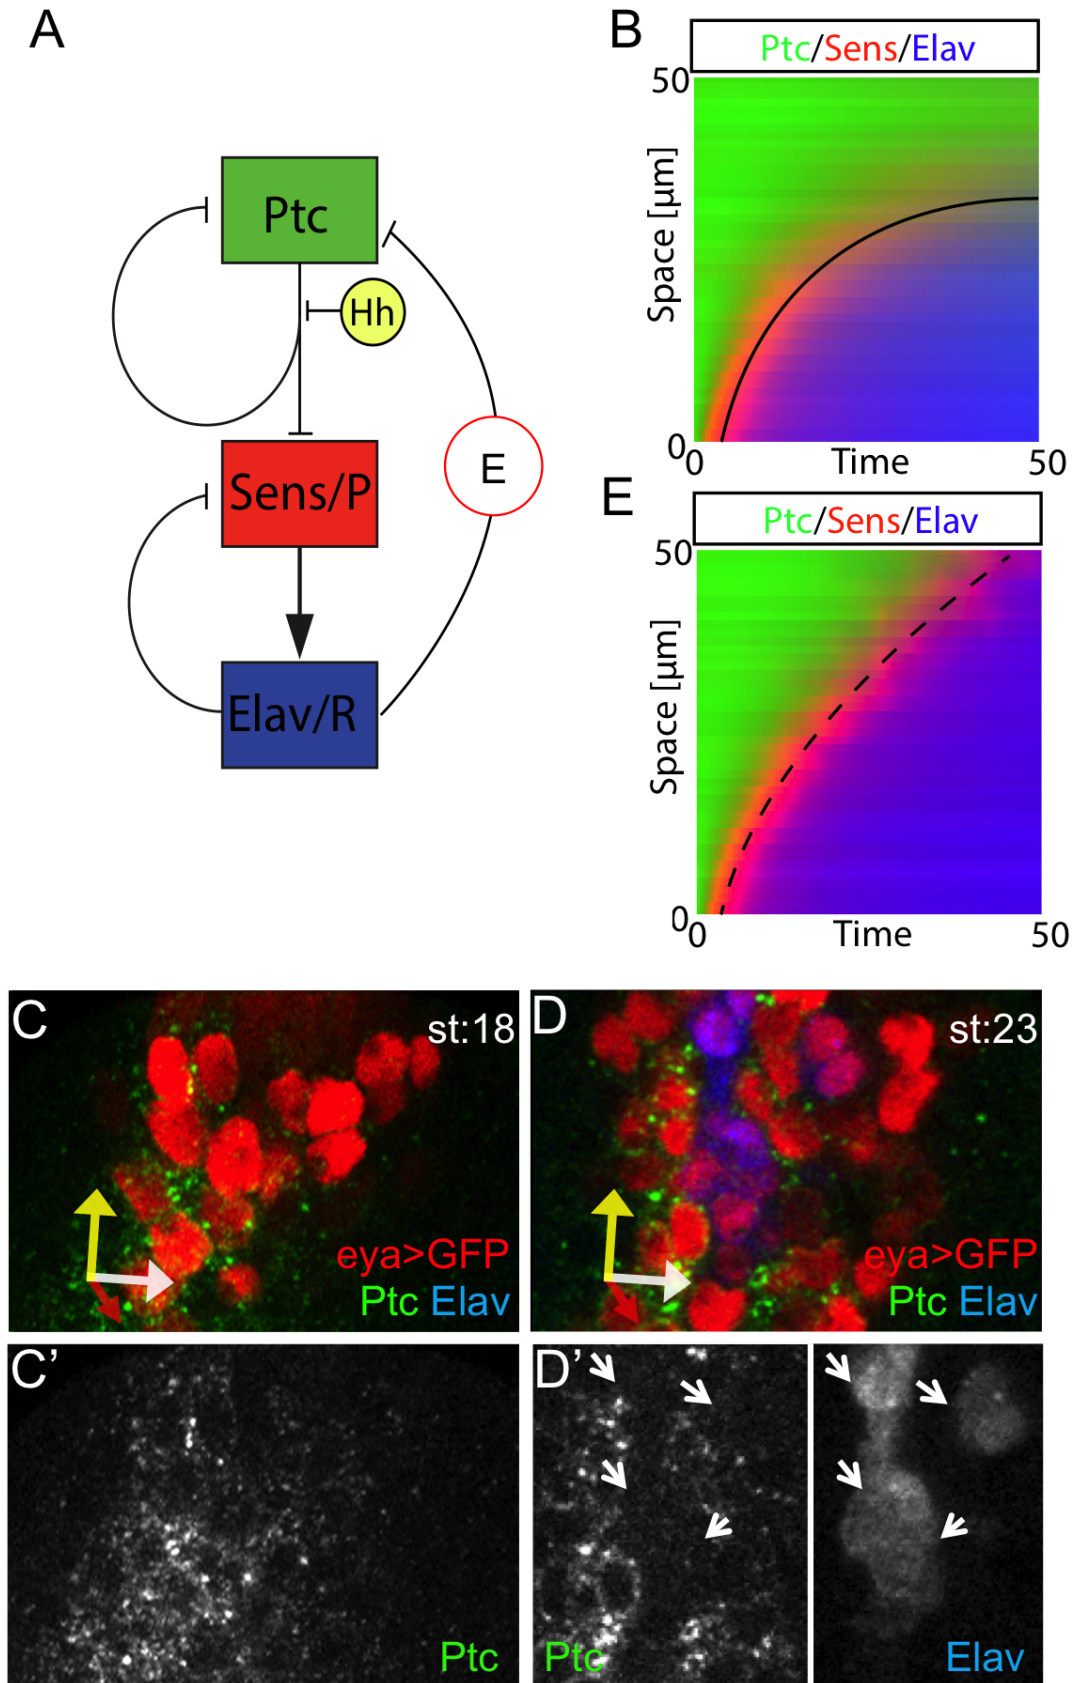

A

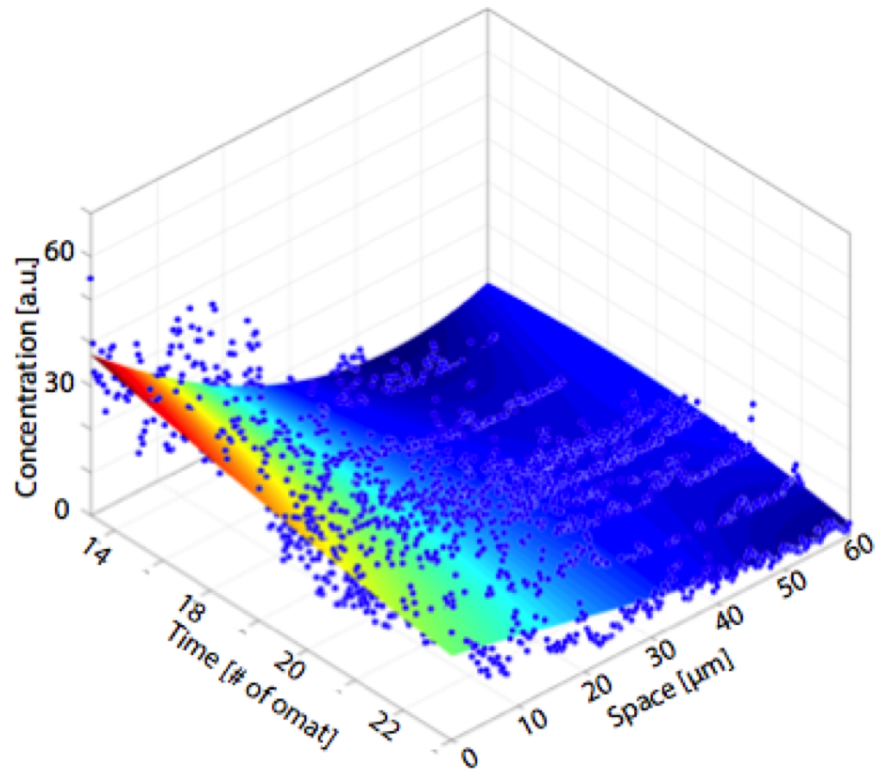

B

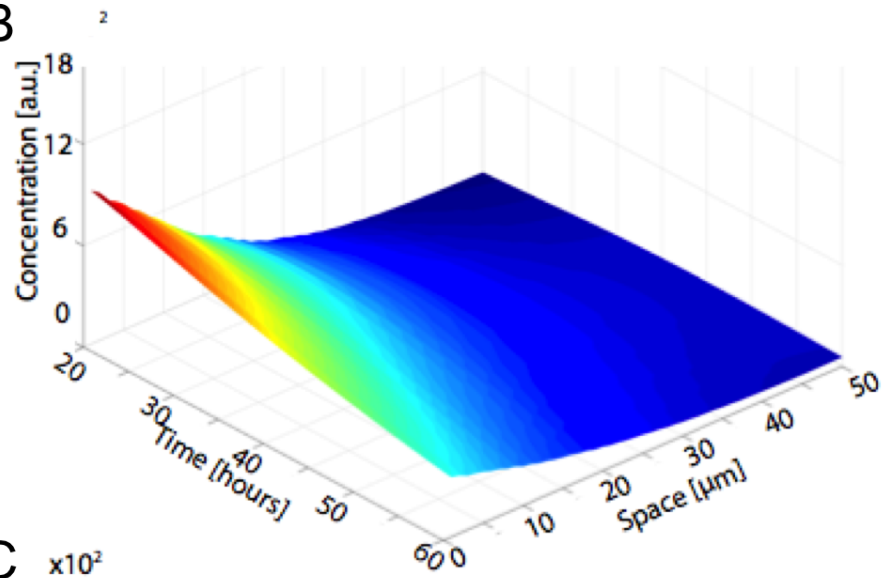

C

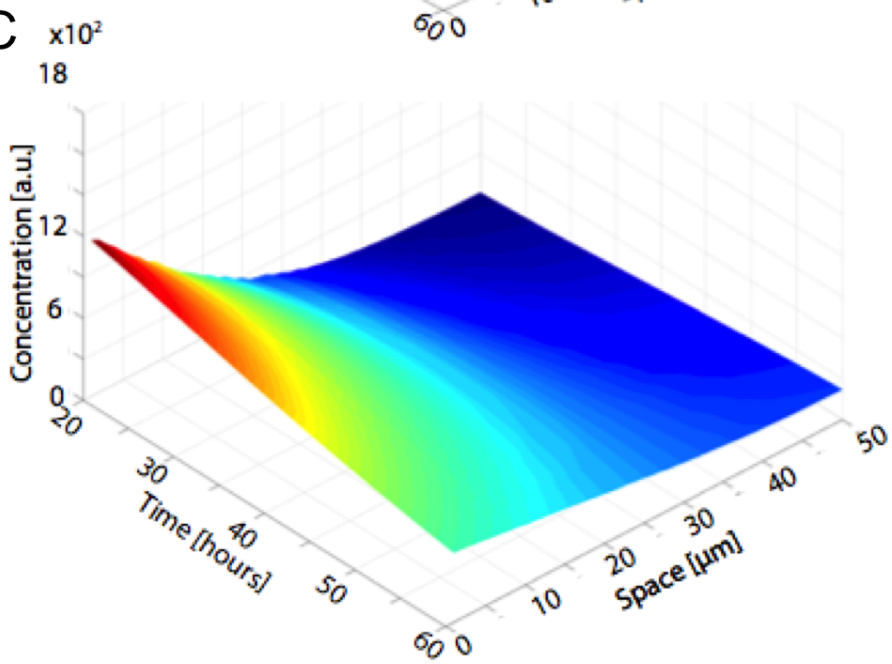

Figure 4, S table. García-Morales et al.

**Values, units and source of model parameters**

| Variable                   | value   | Units                       | Source                                      |
|----------------------------|---------|-----------------------------|---------------------------------------------|
| Dimensions of Ocelus       | 55 x 55 | $\mu\text{m}^2$             | Experim. estimated                          |
| Number of cells in Ocelus  | 110     | -                           | Experim. estimated                          |
| Number of cells in row     | 10      | -                           | Experim. estimated                          |
| Number of rows             | 11      | -                           | Experim. estimated                          |
| Total Time                 | 50      | hours                       | Experim. estimated                          |
| Rate of Hh expression 1    | 200     |                             |                                             |
| High Rate of Hh expression | 440     |                             |                                             |
| $k_{Hh}$                   | 0.002   | 1/hour                      | Value that best fits the experimental data  |
| $\alpha$                   | 20      | 1/hour                      | fitted                                      |
| $\beta$                    | 10      | 1/hour                      | fitted                                      |
| $A$                        | 20      | adimensional                | fitted                                      |
| $B$                        | 1       | adimensional                | fitted                                      |
| $C$                        | 40      |                             |                                             |
| $m$                        | 3       | adimensional                | fitted                                      |
| $D$                        | 4       | $\mu\text{m}^2/\text{hour}$ | Value that best fits the experimental data. |
| Theshold for Elav          | 40      |                             |                                             |

# Figure 4 S2 Garcia-Morales et al.

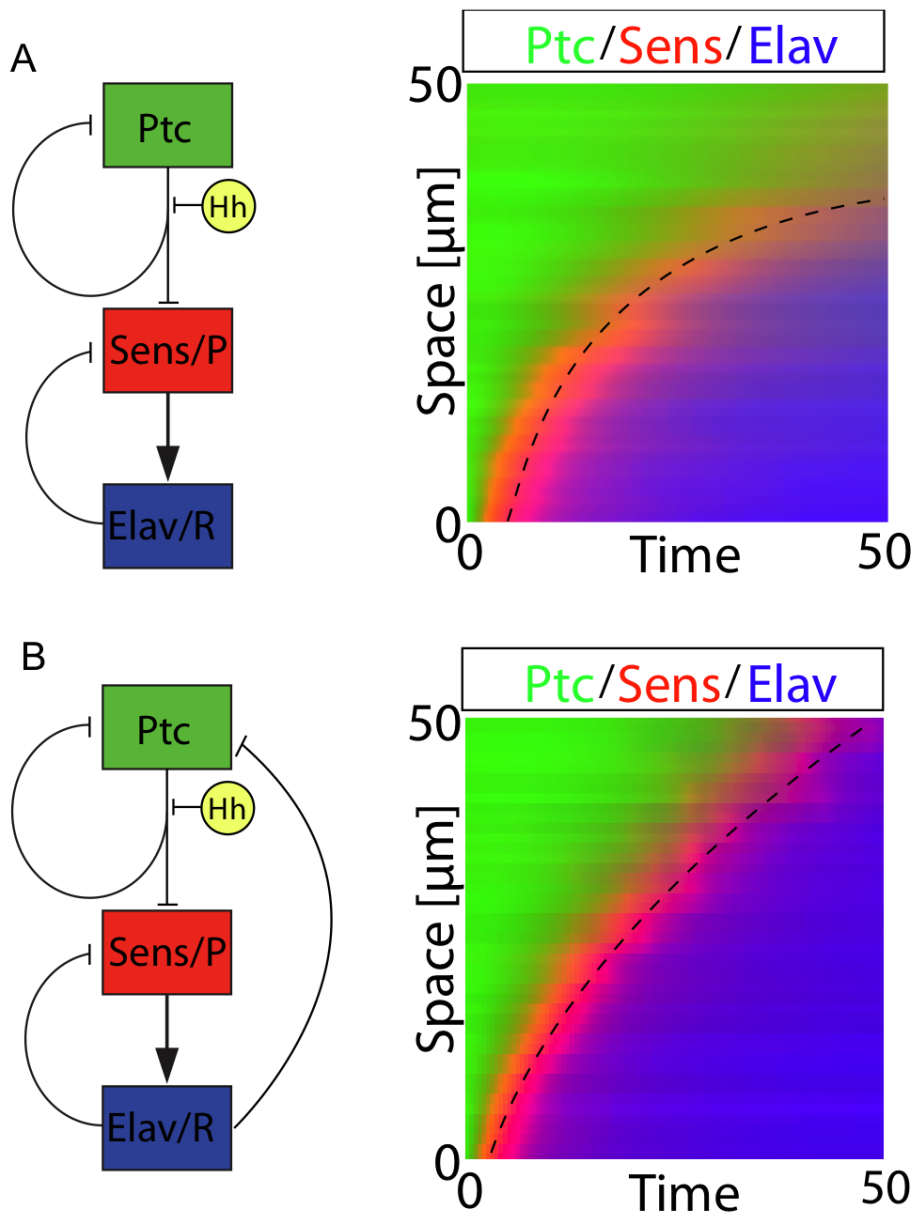



Figure 4 S3. García-Morales et al.

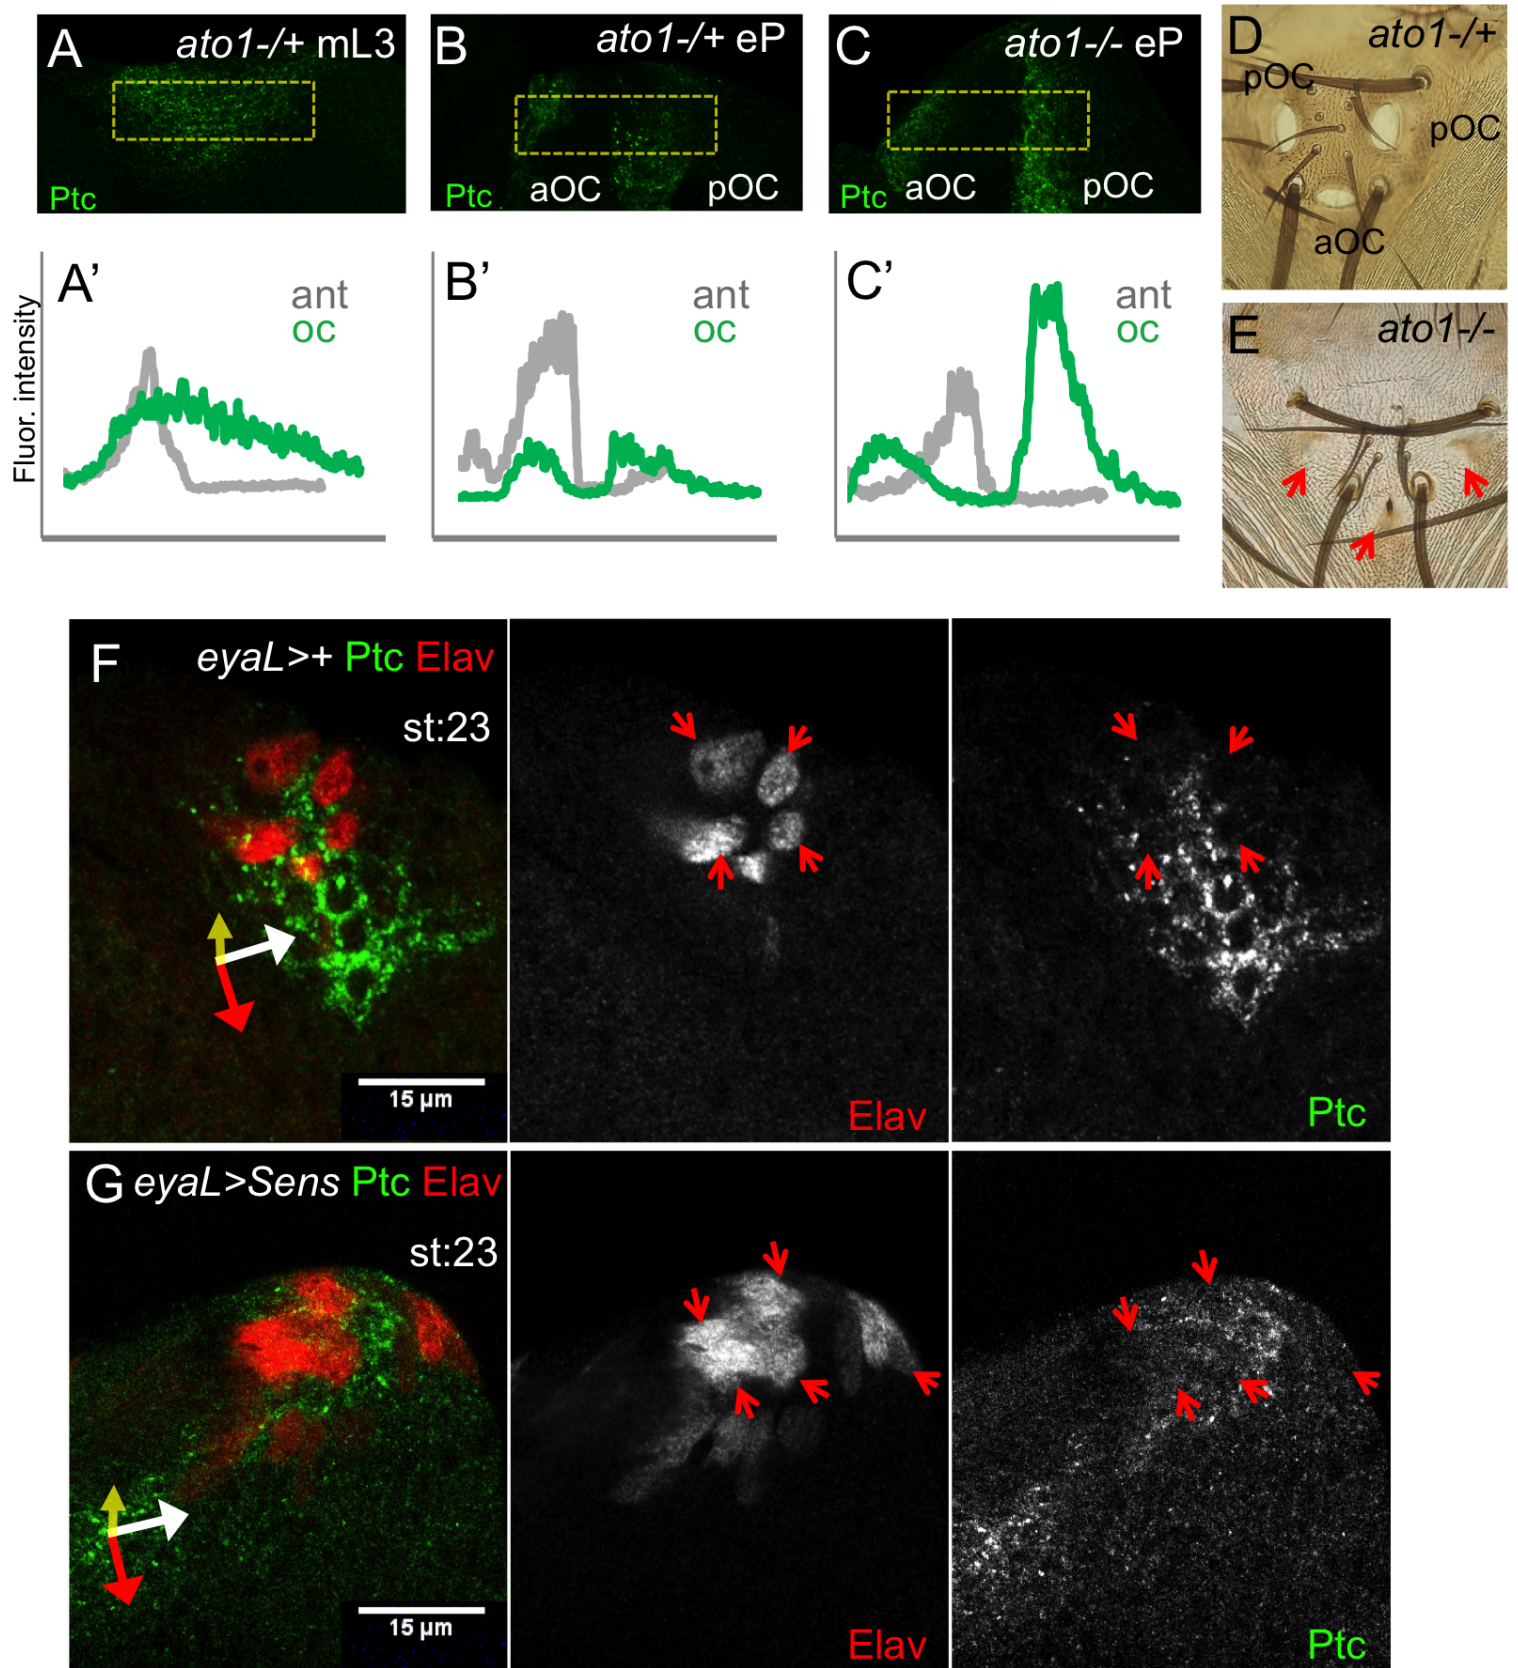

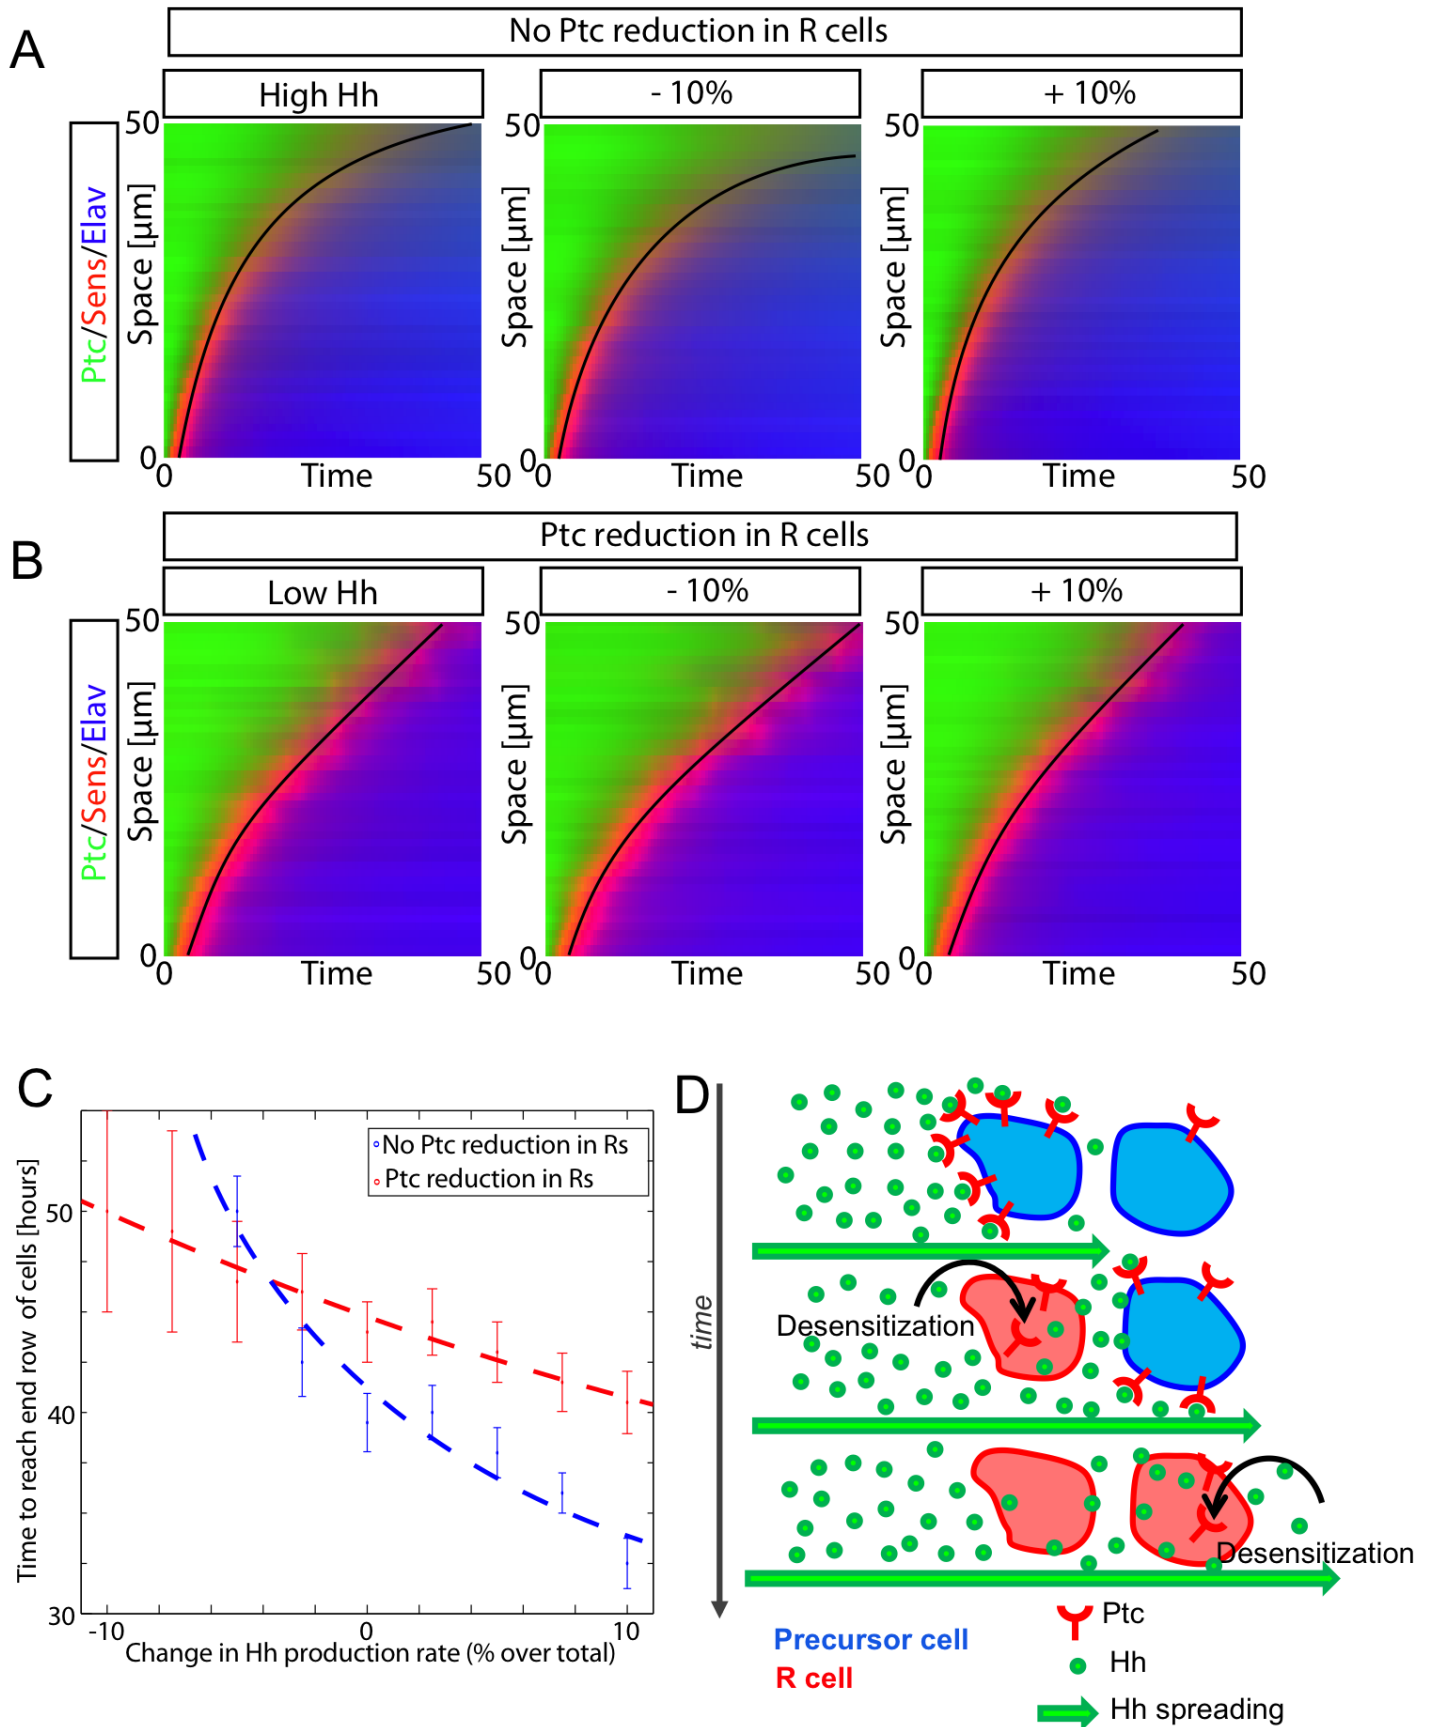

Figure 5—Figure S1: Garcia-Morales et al.

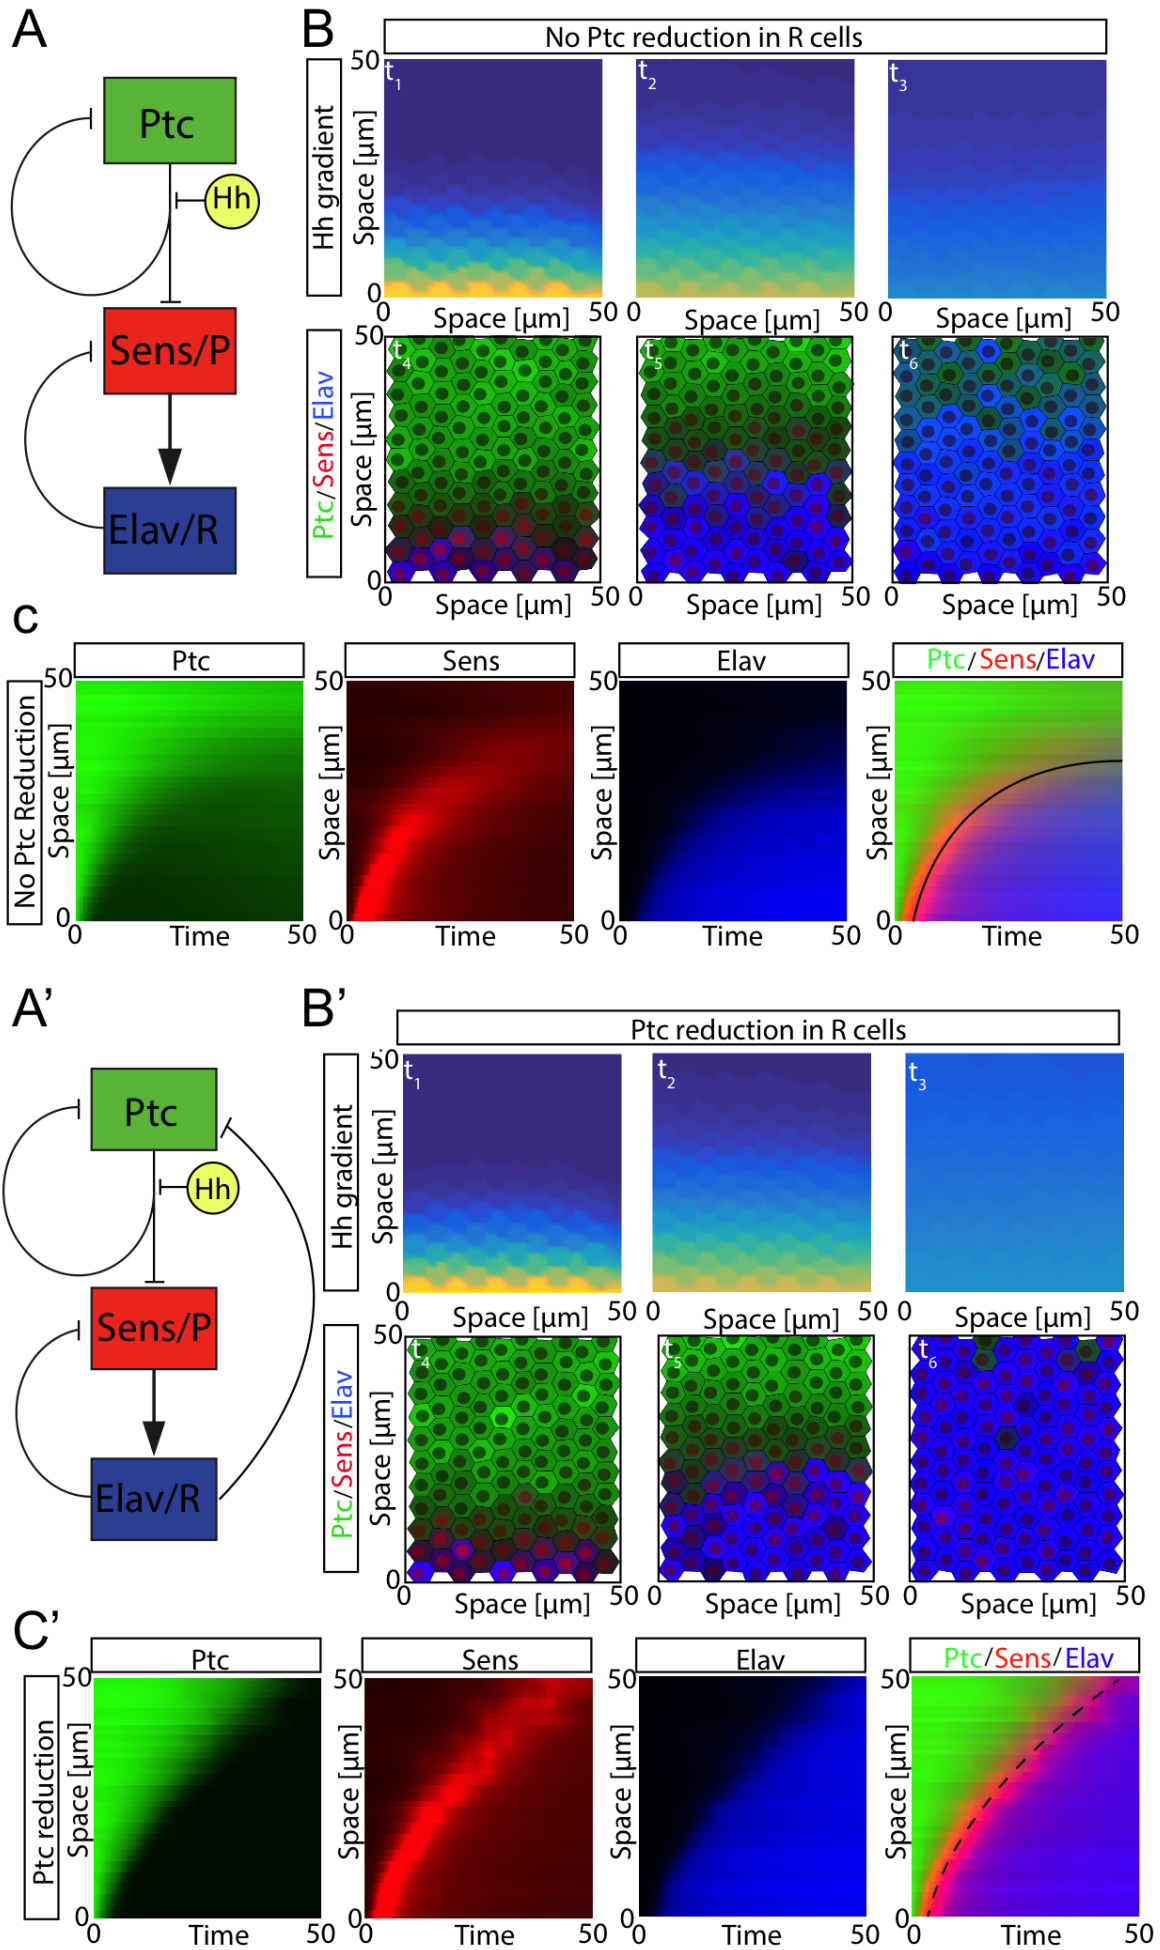

Source: https://www.biorxiv.org/content/10.1101/451872.full.pdf
